# Supplementary material for: A Comparative Analysis of Super-Enhancers and Broad H3K4me3 Domains in Pig, Human, and Mouse Tissues
Source: Front Genet. 2021 Nov 24;12:701049. doi: 10.3389/fgene.2021.701049 (PMC8652260; doi:10.3389/fgene.2021.701049)
Supplement: Supplementary file 5 [file Table6.XLSX]

## Sheet: Description
summary: the number of pig functional conserved SEs and BDs, and the number of pig-specific conserved SEs and BDs, and their percentage in total
pig*: the bed files for pig functional conserved SEs and BDs (_s), pig-specific SEs (_u) and BDs in each tissue

## Sheet: summary
Tissue	type	total	pig-conserved	pig-conserved(% in total)	pig-specific	pig-specific(% in total)
Adipose	SE	850	79	9.29412	619	72.8235
Brain	SE	1169	55	4.70488	862	73.7382
Liver	SE	1042	126	12.0921	634	60.8445
Lung	SE	839	78	9.29678	622	74.1359
Muscle	SE	1044	182	17.433	582	55.7471
Spleen	SE	727	114	15.6809	393	54.0578
Adipose	BD	1957	257	13.1323	1081	55.2376
Brain	BD	1985	309	15.5668	866	43.6272
Liver	BD	1464	173	11.8169	851	58.1284
Lung	BD	1353	178	13.1559	776	57.354
Muscle	BD	1700	169	9.94118	1072	63.0588
Spleen	BD	1248	99	7.93269	792	63.4615

## Sheet: pig_adipose_BD_s
chr5	89583570	89587319	ppeak1
chr4	98562196	98565074	ppeak100
chr2	531071	533188	ppeak1004
chr5	76636936	76639053	ppeak1006
chr3	94862485	94865349	ppeak102
chr16	51458076	51460936	ppeak103
chr6	72596435	72598545	ppeak1038
chr6	8468119	8470226	ppeak1050
chr2	98442506	98444608	ppeak1064
chr5	7087337	7089439	ppeak1065
chr12	58703971	58706070	ppeak1076
chr13	32808000	32810093	ppeak1087
chr13	152002189	152005043	ppeak109
chr6	141958761	141960852	ppeak1095
chr4	99348649	99352099	ppeak11
chr1	4881618	4883700	ppeak1119
chr1	22240683	22242760	ppeak1134
chr2	27683784	27685861	ppeak1135
chr6	47493928	47496775	ppeak114
chr10	43517487	43519556	ppeak1158
chr4	12457268	12460110	ppeak116
chr1	21046707	21049546	ppeak117
chr8	48020692	48022758	ppeak1170
chr15	48694553	48696617	ppeak1175
chr13	43131892	43134728	ppeak118
chr2	131015465	131017524	ppeak1194
chr3	100886602	100888661	ppeak1195
chr6	19890768	19892826	ppeak1202
chr1	248607437	248609493	ppeak1212
chr3	18178526	18180577	ppeak1230
chr14	10023144	10025192	ppeak1239
chr4	79872965	79875783	ppeak125
chrX	34763481	34765524	ppeak1259
chr18	29705204	29707246	ppeak1264
chr1	130385054	130387861	ppeak127
chrX	54948358	54950394	ppeak1292
chr14	75117749	75119784	ppeak1293
chr1	10224737	10228170	ppeak13
chr8	99309252	99312049	ppeak130
chr14	28256075	28258106	ppeak1305
chr5	12239692	12241721	ppeak1313
chr14	51160334	51162360	ppeak1323
chr14	113637768	113639794	ppeak1324
chr12	14668934	14670958	ppeak1334
chr13	153996144	153998168	ppeak1335
chr2	83690318	83692339	ppeak1348
chr15	128307104	128309118	ppeak1373
chr2	150561277	150563288	ppeak1389
chr4	117067601	117069608	ppeak1400
chr10	56427186	56429958	ppeak143
chr13	3330073	3332841	ppeak145
chr4	93412285	93414276	ppeak1455
chr9	32811183	32813173	ppeak1461
chr12	22061367	22064133	ppeak148
chr3	5462902	5464886	ppeak1489
chr15	109374663	109377426	ppeak150
chr5	59734280	59736259	ppeak1516
chr9	55620302	55623062	ppeak153
chr5	59728000	59729973	ppeak1538
chr10	10264339	10266311	ppeak1541
chr5	21273389	21275359	ppeak1555
chr11	66482725	66485475	ppeak158
chr1	133013993	133016742	ppeak159
chr17	30220913	30224280	ppeak16
chr8	118203000	118205748	ppeak160
chr13	202464357	202467099	ppeak162
chr15	47695810	47697763	ppeak1631
chr14	40276832	40278784	ppeak1634
chr6	155800956	155803694	ppeak164
chr13	125399145	125401076	ppeak1720
chr2	150033598	150036321	ppeak173
chr6	147320318	147322237	ppeak1777
chr1	98540552	98543864	ppeak18
chr18	54428040	54430755	ppeak180
chr4	101919716	101921628	ppeak1811
chr6	41423218	41425931	ppeak182
chr9	64033861	64035768	ppeak1836
chr14	121467862	121469768	ppeak1839
chr17	28029951	28031856	ppeak1846
chr3	72793240	72795143	ppeak1859
chr12	23265623	23268331	ppeak186
chr10	30427081	30428977	ppeak1891
chr12	1444144	1446840	ppeak191
chr3	79702144	79704035	ppeak1921
chr6	157219560	157221450	ppeak1930
chr6	49550797	49552683	ppeak1949
chr13	68993392	68996681	ppeak20
chr11	25771249	25773921	ppeak200
chr14	123343780	123346451	ppeak202
chr1	159529667	159532327	ppeak207
chr6	51872850	51875509	ppeak208
chr4	20645041	20648323	ppeak21
chr5	14100766	14103413	ppeak215
chr18	43725172	43728453	ppeak22
chr5	15089098	15091743	ppeak221
chr3	1810923	1813567	ppeak223
chrX	41193051	41195670	ppeak237
chr15	54723403	54726018	ppeak239
chr15	120093060	120096315	ppeak24
chr12	35847946	35850558	ppeak241
chr12	45172057	45174669	ppeak242
chr16	25670881	25673484	ppeak249
chr1	121412810	121415395	ppeak259
chr2	57324618	57327868	ppeak26
chr8	72587218	72589800	ppeak262
chr11	15407847	15410427	ppeak263
chr14	124400111	124402691	ppeak264
chr17	1212778	1215344	ppeak274
chr10	28508376	28510936	ppeak277
chr4	16099915	16102475	ppeak278
chr17	51722143	51725383	ppeak28
chr16	64359088	64361647	ppeak280
chr1	236466351	236468906	ppeak282
chr9	72761714	72764950	ppeak29
chr7	38746103	38748646	ppeak295
chr13	77178762	77181299	ppeak298
chr13	190283946	190287613	ppeak3
chr9	47475133	47477663	ppeak305
chr12	21977741	21980954	ppeak31
chr2	120684573	120687094	ppeak312
chr5	63939686	63942203	ppeak314
chr9	47344842	47347353	ppeak319
chr8	80302853	80306066	ppeak32
chr8	131858663	131861173	ppeak320
chr17	62869565	62872071	ppeak325
chr5	23130372	23132875	ppeak328
chr8	108914872	108917375	ppeak329
chr7	100120161	100123355	ppeak33
chr6	52935021	52937514	ppeak336
chr12	52416457	52418948	ppeak339
chr1	223745049	223748239	ppeak34
chr6	103232900	103235387	ppeak341
chr13	92515607	92518090	ppeak343
chr1	167853419	167855897	ppeak348
chr8	41853533	41856689	ppeak35
chr9	83418138	83420616	ppeak350
chr13	190410156	190412633	ppeak351
chr13	84634089	84636564	ppeak357
chr12	20375815	20378285	ppeak362
chr6	153685732	153688184	ppeak378
chr1	208147930	208151056	ppeak38
chr4	13445309	13447757	ppeak382
chr9	55442769	55445213	ppeak385
chr1	166697543	166701195	ppeak4
chr14	46407775	46410203	ppeak400
chrY	10163166	10165594	ppeak401
chr6	69009844	69012270	ppeak403
chr11	52156481	52158903	ppeak412
chr9	52095291	52097709	ppeak414
chrUn_NW_018084874v1	878091	880509	ppeak415
chr15	63495477	63497883	ppeak424
chr1	248031430	248033834	ppeak425
chr4	87909321	87911725	ppeak426
chr2	112815064	112817452	ppeak443
chr15	110377028	110379413	ppeak446
chr4	110195941	110198323	ppeak452
chr8	87477972	87480349	ppeak463
chr13	25163513	25165884	ppeak465
chr14	30884341	30886709	ppeak470
chr14	87913958	87916325	ppeak473
chr5	78124733	78127095	ppeak485
chr5	21174023	21177096	ppeak49
chr3	25870422	25872781	ppeak490
chr7	2246500	2248857	ppeak492
chr1	158859985	158862337	ppeak497
chr17	35412174	35415769	ppeak5
chr14	32769278	32771628	ppeak500
chr9	123760173	123762522	ppeak502
chr17	33410239	33412585	ppeak505
chr17	30236650	30239711	ppeak51
chr2	143498878	143501221	ppeak511
chr7	37853153	37856214	ppeak52
chr5	22434803	22437140	ppeak520
chr2	59531142	59533475	ppeak524
chr5	61337489	61339819	ppeak530
chr16	24644016	24646345	ppeak531
chr3	40353359	40355688	ppeak532
chr13	124582173	124584494	ppeak545
chr6	151222915	151225236	ppeak546
chr12	33210063	33213073	ppeak57
chr17	19627300	19629607	ppeak578
chr1	220754286	220757293	ppeak58
chr10	54674276	54677276	ppeak59
chr6	131915994	131919570	ppeak6
chr2	6808617	6811611	ppeak60
chr5	29595945	29598238	ppeak603
chr7	60822469	60824758	ppeak608
chr6	48063757	48066042	ppeak612
chr16	33777000	33779282	ppeak615
chr9	10432975	10435253	ppeak627
chr1	236265517	236267793	ppeak632
chr13	202127018	202129293	ppeak634
chr1	234368358	234370626	ppeak645
chr14	81407219	81409486	ppeak647
chr2	65302942	65305205	ppeak654
chr1	164997614	164999875	ppeak659
chr9	100845632	100848611	ppeak66
chr9	46172672	46174927	ppeak678
chr1	219812354	219815317	ppeak69
chr13	68301228	68303477	ppeak695
chr17	35316540	35318788	ppeak696
chr8	86879318	86882868	ppeak7
chr14	56545227	56548187	ppeak70
chr13	90640546	90643504	ppeak71
chr13	179912879	179915120	ppeak713
chr7	23219932	23222173	ppeak714
chr16	28776070	28778308	ppeak717
chr2	61270798	61273031	ppeak725
chr10	50539208	50541440	ppeak727
chr17	33609236	33611465	ppeak733
chr1	40999158	41002102	ppeak74
chr9	7765971	7768197	ppeak745
chr4	32092434	32094659	ppeak748
chr2	57742055	57744997	ppeak75
chr1	208182554	208184776	ppeak750
chrX	122121927	122124148	ppeak753
chr13	131662202	131664418	ppeak763
chr1	107207536	107209751	ppeak767
chr10	66488454	66490667	ppeak772
chr3	56750978	56753188	ppeak775
chr9	131425600	131427810	ppeak779
chr7	49831963	49834166	ppeak791
chr7	92491924	92495472	ppeak8
chr11	50099829	50102754	ppeak80
chr18	29680375	29682572	ppeak809
chr15	71496248	71498441	ppeak815
chr2	44612523	44614716	ppeak816
chr1	164656128	164658319	ppeak821
chr14	59112840	59115755	ppeak83
chr17	43409523	43411710	ppeak830
chr5	93303153	93305337	ppeak836
chr2	117235167	117237346	ppeak845
chr9	51990189	51992368	ppeak849
chr4	103375563	103377731	ppeak877
chr14	63297961	63300120	ppeak897
chr3	58998995	59001154	ppeak898
chr12	5116608	5120139	ppeak9
chrX	88172927	88175084	ppeak906
chr13	52971768	52973924	ppeak907
chr3	103813754	103815899	ppeak933
chr13	52455878	52458022	ppeak934
chr2	29824	31967	ppeak939
chr4	94495988	94498131	ppeak940
chr9	139301897	139304039	ppeak943
chr4	127035779	127037918	ppeak948
chr5	8985719	8988612	ppeak95
chr14	106791932	106794070	ppeak950
chr4	62600231	62602369	ppeak951
chr16	71357669	71359804	ppeak963
chr7	112160822	112162949	ppeak977
chr2	6640067	6642193	ppeak978
chr4	95284138	95286264	ppeak979
chr5	64319108	64321234	ppeak980
chr12	24797090	24799213	ppeak985
chr4	14295194	14298072	ppeak99
chr3	102538196	102540317	ppeak995
chr10	14467393	14469513	ppeak996

## Sheet: pig_adipose_BD_u
chr7	32788262	32790380	ppeak1001
chr13	202895479	202897596	ppeak1002
chr5	11365640	11367757	ppeak1005
chr6	128249228	128251345	ppeak1007
chr1	146001858	146003974	ppeak1008
chr1	173388482	173390598	ppeak1009
chr3	13563500	13566366	ppeak101
chr4	107821049	107823165	ppeak1011
chr5	14020194	14022310	ppeak1012
chr7	94444608	94446724	ppeak1013
chr8	30758254	30760369	ppeak1014
chr8	40844886	40847001	ppeak1015
chr14	81761844	81763958	ppeak1016
chr18	46413303	46415417	ppeak1017
chr2	120117495	120119609	ppeak1018
chr5	68166743	68168857	ppeak1019
chr6	28346596	28348710	ppeak1020
chr1	194351491	194353604	ppeak1021
chr15	46757427	46759540	ppeak1022
chr10	16739690	16741802	ppeak1023
chr13	50627612	50629724	ppeak1024
chr13	189199295	189201407	ppeak1025
chr4	57976557	57978669	ppeak1027
chr14	66919128	66921239	ppeak1029
chr15	32063821	32065932	ppeak1030
chr14	50812617	50814727	ppeak1033
chr3	75480121	75482231	ppeak1034
chr5	58147974	58150084	ppeak1036
chr6	49992866	49994976	ppeak1037
chr8	30360345	30362455	ppeak1039
chr7	40204905	40207765	ppeak104
chr5	27251618	27253727	ppeak1042
chr12	3254508	3256616	ppeak1043
chr18	39663133	39665241	ppeak1045
chr7	42089380	42091488	ppeak1046
chr12	24878503	24880610	ppeak1047
chr3	18506066	18508173	ppeak1048
chr5	69016484	69018591	ppeak1049
chr13	206462926	206465785	ppeak105
chr14	40432779	40434884	ppeak1052
chr17	32843704	32845809	ppeak1053
chr13	70828609	70830713	ppeak1054
chr14	55180273	55182377	ppeak1055
chr14	115275863	115277967	ppeak1056
chr4	48555774	48557878	ppeak1057
chr6	56240543	56242647	ppeak1058
chr13	197006292	197008395	ppeak1059
chr14	54890123	54892226	ppeak1060
chr4	92789517	92791620	ppeak1061
chr18	55644099	55646201	ppeak1063
chr7	23046042	23048144	ppeak1066
chr4	112612391	112614492	ppeak1067
chrX	43148211	43150312	ppeak1068
chr2	132535178	132538036	ppeak107
chr15	110788362	110790462	ppeak1071
chr3	41132677	41134777	ppeak1072
chr3	113502223	113504323	ppeak1073
chr6	89248218	89250318	ppeak1074
chrX	98180014	98182114	ppeak1075
chrX	90825146	90827245	ppeak1077
chr14	51101595	51103693	ppeak1078
chr9	103062643	103064741	ppeak1079
chr7	37180732	37182829	ppeak1080
chr9	136741218	136743315	ppeak1081
chrX	7618097	7620194	ppeak1082
chr1	159185751	159187846	ppeak1084
chr7	33377741	33379835	ppeak1086
chr6	74931790	74933883	ppeak1089
chr9	132727553	132729646	ppeak1090
chr1	31674340	31676432	ppeak1091
chr1	29935673	29937761	ppeak1098
chr17	36108169	36111019	ppeak110
chr3	106548209	106550297	ppeak1102
chr8	110199744	110201832	ppeak1103
chr11	18296763	18298850	ppeak1105
chr15	48347482	48349569	ppeak1106
chr10	24602331	24604417	ppeak1107
chrX	101399107	101401193	ppeak1109
chr14	104939250	104941335	ppeak1111
chr17	62893605	62895690	ppeak1112
chr5	21585756	21587841	ppeak1113
chr9	729848	731933	ppeak1114
chr1	185397211	185399294	ppeak1116
chr7	114034881	114036964	ppeak1117
chrX	42997142	42999225	ppeak1118
chr13	206709200	206711282	ppeak1120
chr15	106996194	106998276	ppeak1121
chr17	62641389	62643471	ppeak1122
chr9	56748195	56750277	ppeak1123
chrX	113932435	113934517	ppeak1124
chr6	95070178	95072259	ppeak1125
chr13	75905334	75907413	ppeak1128
chr13	157411228	157413307	ppeak1129
chr6	53442207	53444286	ppeak1131
chr1	272960879	272962957	ppeak1132
chr16	64251161	64253239	ppeak1133
chr8	71601606	71603683	ppeak1136
chr13	29752743	29754818	ppeak1137
chr15	106409079	106411154	ppeak1138
chrX	55629653	55631728	ppeak1139
chr17	39325496	39327570	ppeak1140
chr2	136421405	136423479	ppeak1141
chr3	6354295	6356369	ppeak1142
chr2	59951364	59953437	ppeak1144
chr10	27159614	27161686	ppeak1147
chr16	50989039	50991111	ppeak1148
chr18	42650788	42652860	ppeak1150
chr2	69235267	69237339	ppeak1151
chr6	15950523	15952594	ppeak1154
chr2	39703630	39705700	ppeak1155
chr7	23767544	23769614	ppeak1156
chr7	69527296	69529366	ppeak1157
chr13	97888736	97890805	ppeak1159
chr6	170401056	170403125	ppeak1162
chr14	10195383	10197451	ppeak1164
chr2	123242483	123244551	ppeak1165
chr2	137205492	137207560	ppeak1166
chr15	48441807	48443874	ppeak1167
chr3	128903106	128905173	ppeak1168
chr4	117509455	117511521	ppeak1169
chr6	129246624	129248689	ppeak1171
chr9	6268533	6270598	ppeak1172
chr10	12854821	12856884	ppeak1176
chr14	6443258	6445321	ppeak1178
chr15	7685323	7687386	ppeak1179
chr8	33176186	33178249	ppeak1181
chr8	129801653	129803715	ppeak1182
chr1	186529438	186531499	ppeak1183
chr1	209180781	209182842	ppeak1184
chr12	22689280	22691341	ppeak1186
chr12	60819774	60821835	ppeak1187
chr4	74326943	74329003	ppeak1190
chr7	111450367	111452427	ppeak1191
chr14	10382352	10384411	ppeak1192
chr4	129905073	129907132	ppeak1196
chr1	75076807	75078865	ppeak1197
chr1	100697463	100699521	ppeak1198
chr5	80233896	80236731	ppeak120
chr1	239491638	239493695	ppeak1204
chr14	99883930	99885987	ppeak1206
chr15	73771874	73773931	ppeak1207
chr16	6383118	6385951	ppeak121
chr6	51372293	51374350	ppeak1210
chr1	127124238	127126294	ppeak1211
chr6	63950529	63952585	ppeak1215
chr3	39738394	39740449	ppeak1216
chr17	47596324	47598378	ppeak1217
chr4	716370	718424	ppeak1218
chr6	168734434	168736488	ppeak1219
chr3	38387737	38389790	ppeak1221
chrX	109971903	109973956	ppeak1222
chr1	182752567	182754619	ppeak1223
chr2	136883381	136885433	ppeak1224
chr2	140053300	140055352	ppeak1225
chr14	87742465	87744516	ppeak1228
chr6	36464699	36466750	ppeak1231
chr10	56129349	56131399	ppeak1232
chr15	92987940	92989990	ppeak1234
chr3	87231066	87233116	ppeak1235
chr9	108246005	108248055	ppeak1236
chr12	48141464	48143513	ppeak1237
chr4	16200967	16203016	ppeak1238
chrY	40209781	40212602	ppeak124
chr2	97646846	97648894	ppeak1240
chr6	49678865	49680913	ppeak1241
chr1	1591547	1593594	ppeak1243
chr14	107295342	107297389	ppeak1244
chr15	101623383	101625430	ppeak1246
chr12	14367884	14369929	ppeak1248
chr13	139927049	139929094	ppeak1249
chr2	88022819	88024864	ppeak1250
chr4	95379278	95381323	ppeak1252
chrUn_NW_018084833v1	1914693	1916738	ppeak1253
chr7	23163614	23165658	ppeak1255
chr5	390141	392184	ppeak1257
chr6	19045872	19047915	ppeak1258
chr1	33583411	33585453	ppeak1260
chr10	47803442	47805484	ppeak1261
chr10	48177814	48179856	ppeak1262
chr12	32889765	32891807	ppeak1263
chr3	3714325	3716367	ppeak1265
chr3	85407352	85409394	ppeak1266
chr7	20149926	20151968	ppeak1268
chr10	52223934	52225974	ppeak1272
chr15	45762678	45764718	ppeak1274
chr9	49371297	49373337	ppeak1275
chr13	23019618	23021657	ppeak1276
chr17	33909699	33911738	ppeak1277
chr4	14698703	14700742	ppeak1278
chr8	115859216	115861255	ppeak1280
chr1	75521395	75523433	ppeak1281
chr9	103962935	103964973	ppeak1283
chr13	132487237	132489274	ppeak1284
chr14	131287812	131289849	ppeak1285
chr6	103132161	103134198	ppeak1288
chr8	104885784	104887821	ppeak1289
chr12	42600725	42602761	ppeak1290
chr2	87497116	87499151	ppeak1294
chr5	93253117	93255152	ppeak1295
chr2	144619032	144621066	ppeak1296
chr6	59448383	59450417	ppeak1298
chr8	112761458	112763491	ppeak1301
chrX	106659688	106661721	ppeak1302
chr13	118838832	118840864	ppeak1303
chr9	128588041	128590072	ppeak1307
chr16	18414837	18416867	ppeak1309
chr6	137574677	137576707	ppeak1310
chr1	268641270	268643299	ppeak1311
chr9	66314620	66316649	ppeak1315
chr11	34388384	34390412	ppeak1316
chr14	6178825	6180853	ppeak1317
chr6	106418946	106420974	ppeak1318
chr2	15615933	15617960	ppeak1320
chrX	41579450	41581477	ppeak1321
chr12	19077411	19079437	ppeak1322
chr2	28042243	28044269	ppeak1325
chr1	163390511	163392536	ppeak1326
chr17	17915157	17917182	ppeak1329
chr7	117675681	117677706	ppeak1330
chr1	22800460	22802484	ppeak1331
chr1	90298930	90300954	ppeak1332
chr10	57928489	57930513	ppeak1333
chr15	47599620	47601644	ppeak1336
chr4	55738461	55740485	ppeak1338
chr9	66433526	66435550	ppeak1339
chr10	23966212	23968993	ppeak134
chr1	217286744	217288767	ppeak1341
chr10	32755032	32757055	ppeak1342
chr3	92812552	92814575	ppeak1343
chr13	75604605	75606627	ppeak1345
chr14	41441745	41443766	ppeak1347
chr2	96218456	96220477	ppeak1349
chr16	44145517	44147537	ppeak1350
chr6	98253101	98255121	ppeak1352
chrX	19907943	19909963	ppeak1353
chr12	45504518	45506537	ppeak1354
chr3	92988847	92990866	ppeak1355
chr6	51254780	51256799	ppeak1357
chr7	55262520	55264539	ppeak1358
chrY	9874029	9876048	ppeak1359
chr9	131889165	131891943	ppeak136
chr1	184378414	184380431	ppeak1361
chr13	135467217	135469234	ppeak1362
chr6	312484	314501	ppeak1364
chr6	914658	916675	ppeak1365
chr1	95808450	95810466	ppeak1367
chr7	64876399	64878415	ppeak1368
chr6	70312971	70314986	ppeak1369
chr12	33536344	33539121	ppeak137
chr11	68051621	68053635	ppeak1372
chr2	57279108	57281122	ppeak1374
chr2	131369576	131371590	ppeak1375
chr5	100427937	100429951	ppeak1376
chr3	2464664	2466677	ppeak1378
chr7	75720845	75722858	ppeak1380
chr14	114165837	114167849	ppeak1382
chr9	63861257	63863269	ppeak1384
chr9	129579497	129581509	ppeak1385
chr13	189714542	189716553	ppeak1386
chr14	60139869	60141880	ppeak1388
chr7	13126285	13128296	ppeak1390
chr1	53865486	53867496	ppeak1391
chr1	270178797	270180807	ppeak1392
chr6	52109101	52111111	ppeak1394
chr10	60711830	60713839	ppeak1395
chr2	10891948	10893955	ppeak1399
chr5	61764653	61768061	ppeak14
chr1	34357441	34360214	ppeak140
chr6	94890809	94892816	ppeak1401
chr12	47643252	47645258	ppeak1402
chrX	111915244	111917250	ppeak1404
chr13	124181333	124183337	ppeak1406
chr14	77766366	77768370	ppeak1407
chr12	11964753	11966756	ppeak1408
chr12	54543314	54545317	ppeak1409
chr10	53321810	53324583	ppeak141
chr14	126936025	126938028	ppeak1410
chr6	32012652	32014655	ppeak1411
chr11	45017874	45019876	ppeak1413
chr7	96585156	96587158	ppeak1416
chr8	44448733	44450735	ppeak1417
chrX	74462476	74464478	ppeak1418
chr4	32700877	32702878	ppeak1419
chr7	50750325	50753098	ppeak142
chr8	136556217	136558218	ppeak1420
chr12	43752774	43754774	ppeak1422
chr3	1115492	1117492	ppeak1423
chr3	44021346	44023346	ppeak1424
chr18	19572156	19574155	ppeak1427
chr3	132425148	132427147	ppeak1428
chr8	134137093	134139091	ppeak1432
chr1	72311424	72313421	ppeak1433
chr16	23765996	23767993	ppeak1435
chr18	5779008	5781005	ppeak1436
chr3	15025386	15027383	ppeak1437
chr6	144782096	144784093	ppeak1439
chr3	86782302	86784297	ppeak1440
chr6	111235130	111237125	ppeak1441
chr14	75991566	75993560	ppeak1443
chr3	56810417	56812411	ppeak1444
chr7	66795484	66797478	ppeak1445
chr10	32147659	32149652	ppeak1446
chr14	101193185	101195178	ppeak1447
chr2	49803477	49805470	ppeak1448
chr3	85163854	85165847	ppeak1449
chr5	23028262	23030255	ppeak1450
chr6	45576166	45578159	ppeak1451
chr6	55553954	55555947	ppeak1452
chr5	28827978	28829970	ppeak1453
chr17	40170319	40172310	ppeak1454
chrX	90418844	90420835	ppeak1456
chr13	129995495	129997485	ppeak1457
chr14	77934515	77936505	ppeak1458
chr3	127081832	127083822	ppeak1459
chr5	10186570	10188560	ppeak1460
chr1	109825226	109827215	ppeak1462
chr10	57599269	57601258	ppeak1463
chr2	77642963	77644952	ppeak1465
chr7	37655813	37657802	ppeak1466
chr1	15328183	15330171	ppeak1467
chr16	41293036	41295024	ppeak1468
chr13	73773041	73775808	ppeak147
chrX	124443686	124445674	ppeak1470
chr11	19105915	19107901	ppeak1471
chr11	78599782	78601768	ppeak1472
chr14	51131993	51133979	ppeak1473
chr15	117730032	117732018	ppeak1474
chr3	73938781	73940767	ppeak1476
chr4	99306165	99308151	ppeak1478
chr9	102562046	102564032	ppeak1479
chr1	129874408	129876393	ppeak1480
chr12	37613247	37615232	ppeak1482
chr13	3991828	3993813	ppeak1483
chr5	73406969	73408954	ppeak1484
chr6	103964014	103965999	ppeak1485
chr7	75103326	75105311	ppeak1486
chr12	44975125	44977109	ppeak1487
chr13	34838604	34840588	ppeak1488
chr4	127289579	127291563	ppeak1490
chr10	5753433	5755416	ppeak1491
chr12	18914381	18916364	ppeak1492
chr13	74705478	74707461	ppeak1493
chr14	71827058	71829041	ppeak1495
chr6	119356255	119358238	ppeak1496
chr9	95280544	95282527	ppeak1497
chr5	48704529	48706511	ppeak1500
chr2	2019984	2021965	ppeak1503
chr9	17333255	17335236	ppeak1505
chr10	9979237	9981217	ppeak1507
chr5	9272783	9274763	ppeak1508
chr6	148912013	148913993	ppeak1510
chr8	12967568	12969548	ppeak1511
chr8	86402783	86404763	ppeak1512
chr13	181191366	181193345	ppeak1513
chr14	113230431	113232410	ppeak1514
chr2	65107596	65109575	ppeak1515
chr4	72779642	72781620	ppeak1518
chr7	75137683	75139661	ppeak1519
chrX	124282234	124284212	ppeak1520
chr3	44482276	44484253	ppeak1523
chr8	131502212	131504189	ppeak1526
chr17	62880597	62882573	ppeak1527
chr18	54282549	54284525	ppeak1528
chr18	54614310	54616286	ppeak1529
chrX	34522428	34524404	ppeak1530
chr1	253427813	253429788	ppeak1531
chr11	18543171	18545146	ppeak1532
chr6	157843411	157845386	ppeak1534
chr4	85029636	85031610	ppeak1535
chr15	3524766	3526739	ppeak1536
chr16	71856940	71858913	ppeak1537
chr8	81022996	81024969	ppeak1539
chr8	131057581	131059554	ppeak1540
chr14	50324792	50326764	ppeak1542
chr14	59643298	59645270	ppeak1543
chr14	73323598	73325570	ppeak1544
chr6	110121842	110123814	ppeak1547
chr8	73303304	73305276	ppeak1549
chr13	61067170	61069141	ppeak1551
chr16	79356462	79358433	ppeak1552
chr8	33373109	33375080	ppeak1553
chr9	12849917	12851888	ppeak1554
chr15	135592856	135594824	ppeak1557
chr5	6083501	6085469	ppeak1560
chr6	28164524	28166492	ppeak1561
chr1	114749866	114751833	ppeak1563
chr12	54583612	54585579	ppeak1565
chr15	68049766	68051733	ppeak1566
chr6	144423504	144425471	ppeak1567
chr9	17075853	17077820	ppeak1568
chr1	122633717	122635683	ppeak1569
chr1	158336689	158339439	ppeak157
chr1	251276232	251278198	ppeak1570
chr16	3563843	3565809	ppeak1572
chr8	77969328	77971294	ppeak1574
chr11	57792458	57794423	ppeak1575
chr4	84917462	84919427	ppeak1579
chrUn_NW_018085246v1	140945	142910	ppeak1580
chr13	196801787	196803751	ppeak1581
chr2	2057381	2059345	ppeak1582
chr6	159655296	159657260	ppeak1583
chr1	77539581	77541544	ppeak1584
chr2	5798813	5800776	ppeak1585
chr5	49185698	49187661	ppeak1586
chrUn_NW_018084874v1	687957	689920	ppeak1588
chr1	36065021	36066983	ppeak1589
chr12	18741836	18743798	ppeak1590
chr14	47503246	47505208	ppeak1591
chr4	98587840	98589802	ppeak1592
chr7	53145797	53147759	ppeak1593
chr1	232355970	232357931	ppeak1594
chr11	4731284	4733245	ppeak1595
chr13	73830877	73832838	ppeak1596
chr3	54774817	54776778	ppeak1597
chr4	67843670	67845631	ppeak1598
chr1	240984124	240986084	ppeak1599
chr15	879338	881298	ppeak1600
chr2	59522923	59524883	ppeak1602
chr2	108255398	108257358	ppeak1603
chr13	31569375	31571334	ppeak1608
chr16	26658459	26660418	ppeak1609
chr15	101498895	101501642	ppeak161
chr2	16219015	16220974	ppeak1610
chr15	60053774	60055732	ppeak1611
chr3	40693392	40695350	ppeak1612
chr3	37460439	37462396	ppeak1615
chr15	37592471	37594427	ppeak1616
chr13	196595628	196597583	ppeak1620
chr7	113658989	113660944	ppeak1622
chr9	139168701	139170656	ppeak1623
chr16	43345102	43347056	ppeak1624
chr5	10212317	10214271	ppeak1626
chr5	87485746	87487700	ppeak1627
chr12	46084683	46086636	ppeak1628
chr13	121206480	121208433	ppeak1629
chr15	44885780	44887733	ppeak1630
chr2	16132069	16134021	ppeak1635
chr5	24712405	24714357	ppeak1636
chr6	158536141	158538093	ppeak1637
chr15	130752302	130754253	ppeak1640
chr16	40105533	40107484	ppeak1641
chr4	81935959	81937910	ppeak1643
chr18	38800454	38802404	ppeak1644
chr4	77109078	77111028	ppeak1646
chr5	22873708	22875658	ppeak1648
chr12	39974588	39976537	ppeak1649
chr16	52780466	52782415	ppeak1650
chr3	31331717	31333666	ppeak1651
chr3	53032024	53033973	ppeak1652
chr6	37943014	37944963	ppeak1653
chrUn_NW_018084804v1	138732	140681	ppeak1654
chr12	46327217	46329164	ppeak1655
chr2	116845899	116847846	ppeak1656
chr3	72378814	72380761	ppeak1657
chr4	95447985	95449932	ppeak1658
chr6	37192723	37194670	ppeak1659
chr15	104746690	104748636	ppeak1660
chr3	58160504	58162450	ppeak1661
chr4	69802171	69804117	ppeak1662
chr14	34608096	34610041	ppeak1664
chr3	77167862	77169807	ppeak1665
chr4	67816030	67817975	ppeak1666
chr7	56083465	56085410	ppeak1668
chr13	14041702	14043646	ppeak1669
chr13	18994392	18996336	ppeak1670
chr13	122128933	122130877	ppeak1671
chr4	126873797	126875739	ppeak1673
chr5	77644350	77646292	ppeak1675
chr6	52506043	52507985	ppeak1677
chr6	146051194	146053136	ppeak1678
chrX	515437	517379	ppeak1679
chr3	38780710	38782651	ppeak1681
chr7	20997682	20999623	ppeak1682
chr18	55781586	55783526	ppeak1684
chr6	81722888	81724828	ppeak1685
chr1	145058290	145060229	ppeak1686
chr2	84133149	84135088	ppeak1687
chr6	103785422	103787361	ppeak1688
chrX	0	1939	ppeak1689
chr3	94011240	94013178	ppeak1690
chr4	98162635	98164573	ppeak1691
chr6	81358707	81360645	ppeak1692
chr9	42982979	42984917	ppeak1694
chr13	207676029	207677966	ppeak1695
chr18	18008011	18009948	ppeak1696
chr4	98250681	98252618	ppeak1697
chr2	70953772	70955708	ppeak1698
chr6	115926661	115928597	ppeak1700
chrX	108611309	108613245	ppeak1701
chr4	111466182	111468117	ppeak1702
chr5	21559318	21561253	ppeak1703
chr1	175447366	175449300	ppeak1705
chr15	76135107	76137041	ppeak1706
chr16	76489693	76491627	ppeak1707
chr1	82108990	82110923	ppeak1708
chr13	50978545	50980478	ppeak1709
chr3	87388891	87390824	ppeak1711
chr6	168535023	168536956	ppeak1713
chr1	149516065	149517997	ppeak1715
chrUn_NW_018084968v1	1849642	1851574	ppeak1717
chr11	18755747	18757678	ppeak1718
chr12	17305196	17307127	ppeak1719
chr14	29067400	29069331	ppeak1721
chr17	39244078	39246009	ppeak1722
chr4	72880810	72882741	ppeak1724
chr9	50092058	50093989	ppeak1725
chr1	262320785	262322715	ppeak1727
chr7	93083169	93085099	ppeak1729
chr9	23207276	23209206	ppeak1730
chr15	139457300	139459229	ppeak1731
chr10	49240976	49242904	ppeak1732
chr2	105201160	105203088	ppeak1734
chr12	956069	957996	ppeak1736
chr4	97917531	97919458	ppeak1737
chr6	53469954	53471881	ppeak1738
chr8	84811005	84812932	ppeak1739
chrX	109420463	109422390	ppeak1741
chr1	30531492	30533418	ppeak1742
chr14	105829778	105831704	ppeak1743
chr14	108032225	108034151	ppeak1744
chr15	103153523	103155448	ppeak1746
chr18	26046388	26048313	ppeak1747
chr3	4102035	4103960	ppeak1748
chr6	79809221	79811146	ppeak1749
chr7	115369455	115371380	ppeak1750
chr11	45369617	45371541	ppeak1751
chr2	119340352	119342276	ppeak1752
chr8	76269205	76271129	ppeak1755
chr9	64190999	64192923	ppeak1756
chr1	12297226	12299149	ppeak1757
chr15	133119668	133122386	ppeak176
chr3	117591868	117593790	ppeak1761
chr6	13011326	13013248	ppeak1762
chr6	86137730	86139652	ppeak1763
chr9	11004163	11006085	ppeak1765
chr1	136616283	136618204	ppeak1766
chr14	36063516	36065437	ppeak1768
chr14	91118789	91120710	ppeak1769
chr5	46573160	46575081	ppeak1770
chr4	115310522	115312442	ppeak1773
chr2	9607152	9609071	ppeak1776
chr6	168993791	168995710	ppeak1778
chr2	6276003	6277921	ppeak1780
chr14	66965749	66967666	ppeak1783
chr3	46992114	46994031	ppeak1785
chr16	51732799	51734715	ppeak1786
chr9	8760534	8762450	ppeak1787
chr9	46520756	46522672	ppeak1788
chr5	77075077	77077795	ppeak179
chr1	209667071	209668986	ppeak1790
chr1	269724796	269726711	ppeak1791
chr2	108733002	108734917	ppeak1793
chr7	70659792	70661707	ppeak1794
chr4	111164497	111166411	ppeak1796
chr5	46481157	46483071	ppeak1797
chr6	6736767	6738681	ppeak1798
chr6	94960120	94962034	ppeak1799
chr7	15281533	15283447	ppeak1800
chr1	236340167	236342080	ppeak1801
chr11	4053318	4055231	ppeak1802
chr11	25810607	25812520	ppeak1803
chr14	9196634	9198547	ppeak1804
chr13	199830209	199832121	ppeak1807
chr12	40533137	40535851	ppeak181
chr3	40567513	40569425	ppeak1810
chr6	83857584	83859496	ppeak1812
chr9	44595949	44597861	ppeak1814
chr12	14260675	14262586	ppeak1816
chr13	36220959	36222870	ppeak1817
chr15	67319428	67321339	ppeak1820
chr4	106057492	106059403	ppeak1821
chr1	186428920	186430830	ppeak1822
chr12	24072926	24074836	ppeak1823
chr7	84961555	84963464	ppeak1826
chr2	72581377	72583285	ppeak1828
chr6	138434355	138436263	ppeak1829
chr7	33267943	33270656	ppeak183
chrX	110115752	110117660	ppeak1830
chr1	79900327	79902234	ppeak1831
chr11	13515408	13517315	ppeak1832
chr15	103577991	103579898	ppeak1833
chr3	72222109	72224016	ppeak1834
chr10	24035176	24037082	ppeak1837
chr11	78880040	78881946	ppeak1838
chr2	9065368	9067274	ppeak1840
chr6	54564777	54566683	ppeak1841
chr8	29369902	29371808	ppeak1842
chr8	133664526	133666432	ppeak1843
chrUn_NW_018084979v1	3460240	3462146	ppeak1844
chr13	19274596	19276501	ppeak1845
chr1	252393959	252395863	ppeak1847
chr12	52877577	52879481	ppeak1848
chr14	54650858	54652762	ppeak1849
chr15	124212218	124214122	ppeak1851
chr17	31919760	31921664	ppeak1852
chr6	43933251	43935155	ppeak1853
chr1	168528815	168530718	ppeak1855
chr12	15105384	15107287	ppeak1856
chr2	58683105	58685008	ppeak1857
chrUn_NW_018084979v1	1845098	1847001	ppeak1860
chr1	143867062	143868964	ppeak1861
chr13	197687831	197689733	ppeak1862
chrX	125382250	125384152	ppeak1865
chr4	41747734	41749635	ppeak1867
chr15	139989962	139991862	ppeak1868
chr16	47599918	47601818	ppeak1869
chr1	189679902	189682606	ppeak187
chr17	63028678	63030578	ppeak1870
chr3	111530590	111532490	ppeak1871
chr8	43091358	43093258	ppeak1872
chr12	24846120	24848019	ppeak1873
chr13	127933095	127934994	ppeak1874
chr2	119777004	119778903	ppeak1875
chr7	12117288	12119187	ppeak1876
chrUn_NW_018084833v1	1006551	1008450	ppeak1877
chr12	12881344	12883242	ppeak1878
chr13	107016592	107018490	ppeak1879
chr15	87378724	87380622	ppeak1881
chr2	141237072	141238970	ppeak1882
chr2	141945056	141946954	ppeak1883
chr3	78902434	78904332	ppeak1884
chr3	106211970	106213868	ppeak1885
chr3	110472826	110474724	ppeak1886
chr5	68222620	68224518	ppeak1887
chr12	11373899	11375796	ppeak1888
chr3	103491066	103492963	ppeak1890
chr15	48609206	48611102	ppeak1892
chr3	125352640	125354536	ppeak1893
chr7	120754364	120756260	ppeak1895
chrUn_NW_018084833v1	613898	615794	ppeak1896
chr11	78293011	78294906	ppeak1897
chr14	30104887	30108190	ppeak19
chr7	51876936	51878831	ppeak1900
chr16	34477299	34479193	ppeak1901
chr18	44908761	44910655	ppeak1902
chr2	3285595	3287489	ppeak1903
chr1	66497814	66499707	ppeak1904
chr13	69288937	69290830	ppeak1905
chr3	23718990	23720883	ppeak1906
chr4	6920761	6922654	ppeak1907
chr8	84223038	84224931	ppeak1909
chrX	61972269	61974162	ppeak1910
chr10	46898607	46900499	ppeak1911
chr2	45297894	45299786	ppeak1914
chr3	59425420	59427312	ppeak1915
chr3	81195570	81197462	ppeak1916
chr4	72752521	72754413	ppeak1917
chr4	129598472	129600364	ppeak1918
chr6	129634695	129636587	ppeak1919
chr12	7330991	7333685	ppeak192
chr2	135138971	135140862	ppeak1920
chr6	98025348	98027239	ppeak1923
chr1	31795238	31797128	ppeak1924
chr10	41337545	41339435	ppeak1926
chr15	39131953	39133843	ppeak1928
chr7	74294415	74296305	ppeak1931
chr8	33636131	33638021	ppeak1932
chr13	22124683	22126572	ppeak1933
chr13	73573521	73575410	ppeak1934
chr3	7464525	7466414	ppeak1935
chr6	119884591	119886480	ppeak1937
chr10	53602123	53604011	ppeak1938
chr2	143286667	143288555	ppeak1939
chr12	17210165	17212052	ppeak1942
chr3	4930858	4932745	ppeak1943
chr4	7016009	7017896	ppeak1944
chr1	21303628	21305514	ppeak1945
chr14	15033208	15035094	ppeak1946
chr14	45735760	45737646	ppeak1947
chr4	111579560	111581446	ppeak1948
chr2	25421156	25423842	ppeak195
chrUn_NW_018084833v1	389001	390887	ppeak1950
chrX	64550319	64552205	ppeak1951
chr12	5940425	5942309	ppeak1952
chr12	25121502	25123386	ppeak1953
chr13	3134801	3136685	ppeak1954
chr14	7319457	7321341	ppeak1955
chr4	34822806	34824690	ppeak1956
chr6	438642	440526	ppeak1957
chr5	19229957	19232638	ppeak196
chr17	51546467	51549147	ppeak197
chr10	42945059	42947736	ppeak199
chr3	32217995	32220666	ppeak203
chr7	30811077	30813748	ppeak204
chr6	115857548	115860218	ppeak205
chr6	166908091	166910757	ppeak206
chr10	40741408	40744063	ppeak210
chr1	27249078	27251727	ppeak211
chr4	101900439	101903088	ppeak213
chr9	46241264	46243911	ppeak216
chr4	110047211	110049856	ppeak220
chr12	6878903	6881547	ppeak222
chr5	60148158	60150801	ppeak224
chr2	75260868	75263507	ppeak225
chr1	187718598	187721233	ppeak228
chr15	31002179	31005440	ppeak23
chr3	2023630	2026263	ppeak230
chr4	77183058	77185690	ppeak231
chr1	219663136	219665760	ppeak234
chr5	7391815	7394436	ppeak235
chr3	668889	671508	ppeak236
chr4	100441600	100444209	ppeak244
chr8	124148609	124151213	ppeak248
chr15	77648756	77651358	ppeak252
chr5	42930468	42933066	ppeak253
chr5	30187733	30190322	ppeak256
chr2	11917700	11920287	ppeak258
chr2	78284482	78287067	ppeak260
chr2	61468697	61471280	ppeak261
chr2	69922640	69925218	ppeak265
chr1	854755	857324	ppeak270
chr12	23361601	23364168	ppeak272
chr6	58332653	58335215	ppeak275
chr1	17136527	17139079	ppeak283
chr2	33328981	33331532	ppeak284
chr17	51198234	51200784	ppeak285
chr2	118728778	118731327	ppeak288
chr1	219208161	219210708	ppeak289
chr15	95247868	95250415	ppeak290
chr2	7422083	7424622	ppeak296
chr15	115675076	115677613	ppeak299
chr6	39785899	39789131	ppeak30
chr5	53688829	53691361	ppeak301
chr7	3049881	3052413	ppeak302
chr1	190169218	190171749	ppeak303
chr16	19918502	19921029	ppeak307
chr6	45182332	45184859	ppeak308
chr1	33316843	33319367	ppeak311
chr5	18877642	18880162	ppeak313
chr2	85539509	85542025	ppeak316
chr10	21775629	21778135	ppeak324
chr3	112065003	112067507	ppeak326
chr9	40628556	40631059	ppeak330
chr7	1791265	1793763	ppeak332
chr7	28811011	28813506	ppeak334
chr7	92811201	92813695	ppeak335
chr17	36199181	36201673	ppeak338
chr18	34463393	34465875	ppeak344
chrX	58182337	58184818	ppeak346
chr2	51692243	51694722	ppeak347
chr7	13933625	13936102	ppeak352
chr2	90261473	90263949	ppeak354
chr12	22828893	22831368	ppeak356
chr6	6879560	6882034	ppeak360
chr11	20995504	20997975	ppeak361
chr5	99084072	99086541	ppeak364
chr6	54643580	54646045	ppeak365
chr6	31931654	31934117	ppeak367
chr4	18923953	18926412	ppeak372
chr2	4858416	4860872	ppeak375
chr7	21011301	21013752	ppeak380
chr8	69530038	69532488	ppeak381
chr14	107134827	107137270	ppeak386
chr17	62707785	62710224	ppeak389
chr2	16343035	16346160	ppeak39
chr17	18032127	18034565	ppeak390
chrUn_NW_018084979v1	3498584	3501021	ppeak391
chr15	13766056	13768489	ppeak393
chr6	76011727	76014160	ppeak395
chr13	71760727	71763159	ppeak396
chr7	46930985	46933415	ppeak398
chr14	134486472	134488901	ppeak399
chr13	123648300	123651424	ppeak40
chr2	124199056	124201481	ppeak405
chr8	101240255	101242680	ppeak407
chr1	271268872	271271295	ppeak408
chr3	77420658	77423081	ppeak410
chr10	67080680	67083100	ppeak413
chr12	1196066	1198478	ppeak417
chr2	76679126	76681536	ppeak418
chr7	29067170	29070272	ppeak42
chr15	30577511	30579920	ppeak421
chr4	111823970	111826379	ppeak422
chr15	78196153	78198556	ppeak427
chr12	59730698	59733100	ppeak428
chr9	44216495	44218897	ppeak429
chr13	137738366	137740764	ppeak433
chr3	77855275	77857670	ppeak437
chr8	111717434	111719829	ppeak438
chr18	9939659	9942053	ppeak439
chr17	50548697	50551087	ppeak442
chr6	36359997	36362380	ppeak448
chr1	251976389	251979479	ppeak45
chr15	79983403	79985785	ppeak451
chr7	35159545	35161927	ppeak453
chr15	66648772	66651153	ppeak455
chr8	11414449	11416830	ppeak457
chr1	52434204	52436583	ppeak458
chr7	20036142	20038521	ppeak459
chr5	9594898	9597276	ppeak461
chr3	71621013	71623390	ppeak462
chr8	118604633	118607009	ppeak464
chr2	126605034	126607404	ppeak467
chr9	89340036	89342406	ppeak468
chr1	54545715	54548084	ppeak469
chr1	272797989	272800356	ppeak472
chr11	68838956	68841321	ppeak476
chr6	17854314	17856679	ppeak477
chr13	108332893	108335967	ppeak48
chr2	65095594	65097957	ppeak481
chr5	15617782	15620144	ppeak484
chr3	42190442	42192802	ppeak487
chr5	57708808	57711168	ppeak488
chr18	31123315	31125674	ppeak489
chr6	36342144	36344503	ppeak491
chr1	129695566	129697921	ppeak494
chr14	31056808	31059157	ppeak501
chrX	110783299	110785645	ppeak506
chr2	82100515	82102860	ppeak507
chr3	72239848	72242193	ppeak508
chr7	23111715	23114058	ppeak512
chr7	116768723	116771063	ppeak516
chr9	124141957	124144296	ppeak518
chr3	4899952	4902290	ppeak519
chr10	33044888	33047220	ppeak525
chr9	20613169	20615501	ppeak526
chr13	94155512	94157842	ppeak528
chr5	90520462	90522791	ppeak534
chr9	124696042	124698366	ppeak540
chr1	146272813	146275136	ppeak542
chr10	14294387	14296709	ppeak544
chr14	64398237	64400557	ppeak548
chr5	73825020	73827340	ppeak549
chr7	8750944	8753992	ppeak55
chr1	218339167	218341486	ppeak550
chr13	79708357	79710676	ppeak552
chr2	25603732	25606051	ppeak553
chr1	162935783	162938099	ppeak555
chr5	13067167	13069482	ppeak558
chr12	22873882	22876196	ppeak559
chr8	59987182	59990224	ppeak56
chr13	5395908	5398221	ppeak562
chr13	182407437	182409750	ppeak563
chr3	86180116	86182428	ppeak567
chr8	31206457	31208769	ppeak568
chrUn_NW_018085316v1	44093	46405	ppeak569
chr9	98437526	98439836	ppeak571
chr1	273532094	273534403	ppeak572
chr16	27126325	27128634	ppeak573
chr2	7058240	7060549	ppeak574
chr2	46336848	46339156	ppeak577
chr2	18391238	18393543	ppeak581
chr6	101420347	101422652	ppeak582
chr16	35149487	35151791	ppeak583
chr12	13653977	13656280	ppeak585
chr9	19592736	19595036	ppeak591
chr13	168789692	168791991	ppeak593
chr16	68449349	68451646	ppeak597
chr3	31880105	31882400	ppeak599
chr5	4290461	4292755	ppeak600
chr5	94488767	94491061	ppeak601
chr15	100262678	100264970	ppeak604
chr8	10959784	10962076	ppeak606
chr9	21759900	21762191	ppeak607
chr2	80807786	80810074	ppeak609
chr9	9595695	9597983	ppeak610
chr14	109123399	109125682	ppeak613
chr13	52522396	52524677	ppeak618
chr18	4993262	4995543	ppeak619
chr14	61652578	61655568	ppeak62
chr8	74663679	74665958	ppeak624
chr3	11214066	11216344	ppeak626
chr9	88278678	88280956	ppeak628
chr2	62250322	62252598	ppeak633
chr13	89597765	89600037	ppeak638
chr17	52905151	52907423	ppeak639
chr2	80246390	80248662	ppeak640
chr3	114249411	114251682	ppeak642
chr8	108724517	108726787	ppeak644
chr12	61028514	61030782	ppeak646
chr15	80595409	80597675	ppeak648
chr1	113084543	113086808	ppeak650
chr1	80243587	80245851	ppeak651
chr11	49149692	49151956	ppeak652
chr16	51906313	51908577	ppeak653
chr2	26531574	26533836	ppeak657
chr5	10319824	10322086	ppeak658
chr2	4124361	4126622	ppeak660
chr2	77004687	77006948	ppeak661
chr3	117986995	117989256	ppeak662
chr15	130330671	130332931	ppeak663
chr6	83981675	83983935	ppeak665
chr3	107541657	107543916	ppeak666
chr11	77353834	77356092	ppeak667
chr13	195233429	195235687	ppeak668
chr5	9633074	9635332	ppeak669
chr5	34425863	34428121	ppeak670
chr17	57984414	57986671	ppeak671
chr6	43527360	43529617	ppeak672
chr3	42133548	42135804	ppeak674
chr3	59805569	59807825	ppeak675
chr5	59869517	59871772	ppeak676
chr5	94016874	94019129	ppeak677
chr3	79923542	79925796	ppeak679
chr7	23796609	23798863	ppeak680
chrX	98621678	98623932	ppeak681
chrX	113530117	113532371	ppeak682
chr10	59629221	59631474	ppeak683
chr13	140583956	140586209	ppeak684
chr14	226110	228362	ppeak686
chr4	98171409	98173660	ppeak688
chr6	52097587	52099837	ppeak691
chr8	32969237	32971487	ppeak692
chr1	90650002	90652251	ppeak693
chr17	40097603	40099851	ppeak697
chr6	53064838	53067086	ppeak699
chr16	44415157	44417402	ppeak701
chr2	69095615	69097859	ppeak702
chr7	92928790	92931034	ppeak703
chr1	97509881	97512124	ppeak704
chr5	52736873	52739116	ppeak705
chr5	63794308	63796551	ppeak706
chr7	31360482	31362725	ppeak708
chr8	70145625	70147867	ppeak710
chr1	217000653	217002894	ppeak711
chr17	61530235	61532474	ppeak715
chr4	33612383	33614622	ppeak716
chr6	51779510	51781748	ppeak718
chr14	140635425	140637662	ppeak719
chr13	23236778	23239014	ppeak720
chr1	261585980	261588214	ppeak722
chr18	9529141	9531374	ppeak724
chr1	94294750	94296981	ppeak728
chr13	136345728	136347959	ppeak729
chr6	105807561	105809792	ppeak731
chr18	9186060	9188289	ppeak734
chr16	52758773	52761001	ppeak736
chr8	41401951	41404179	ppeak737
chrX	8193798	8196026	ppeak738
chr12	36433780	36436006	ppeak740
chr15	77327787	77330013	ppeak741
chr3	92696498	92698724	ppeak742
chr4	91400191	91402417	ppeak743
chr7	55371930	55374156	ppeak744
chr18	41932498	41934723	ppeak747
chr17	52160750	52162974	ppeak749
chr2	77109581	77111802	ppeak752
chr3	14700772	14702992	ppeak754
chrX	98104027	98106247	ppeak755
chr3	80790250	80792469	ppeak756
chr1	164480337	164482555	ppeak758
chr14	108738606	108740824	ppeak759
chr8	82596524	82599458	ppeak76
chr1	99081082	99083299	ppeak761
chr1	182604051	182606268	ppeak762
chr6	63287259	63289475	ppeak765
chr2	85641452	85643667	ppeak768
chrUn_NW_018085316v1	48791	51006	ppeak769
chr3	41207395	41209609	ppeak770
chr4	126716284	126718494	ppeak776
chr8	35004150	35006360	ppeak777
chr12	32008579	32011508	ppeak78
chr1	87115927	87118136	ppeak780
chr1	19096100	19098308	ppeak781
chr13	18242641	18244847	ppeak784
chr13	132819699	132821905	ppeak785
chr2	77247094	77249300	ppeak786
chr13	54324536	54326740	ppeak788
chr13	64933706	64935910	ppeak789
chr17	265009	267938	ppeak79
chr12	1480811	1483014	ppeak790
chr17	52348913	52351115	ppeak793
chr4	111345987	111348187	ppeak799
chr14	113405931	113408130	ppeak800
chr16	72126304	72128503	ppeak801
chr18	17443859	17446058	ppeak802
chr15	103878962	103881160	ppeak804
chr3	73396215	73398413	ppeak805
chr17	32283709	32285906	ppeak808
chr1	194842250	194844445	ppeak811
chr2	150660103	150662297	ppeak813
chr1	55617478	55619671	ppeak814
chr5	17207137	17209330	ppeak817
chrX	8438794	8440987	ppeak818
chr14	5835714	5838631	ppeak82
chr3	40828950	40831141	ppeak823
chr1	252323070	252325260	ppeak824
chr8	75643356	75645546	ppeak827
chr3	1023384	1025573	ppeak828
chr3	48647796	48649982	ppeak832
chr5	69460403	69462588	ppeak834
chr7	132837	135022	ppeak835
chr14	61665738	61667921	ppeak837
chr15	57417843	57420026	ppeak838
chr15	96854911	96857093	ppeak839
chr16	4783911	4786093	ppeak840
chr7	16884187	16886368	ppeak842
chr13	29995006	29997186	ppeak843
chr17	41219505	41221685	ppeak844
chr3	38017617	38019796	ppeak846
chr4	88804480	88806659	ppeak847
chr5	17400164	17402343	ppeak848
chr8	82986161	82988339	ppeak851
chr9	93393316	93395494	ppeak852
chr1	273474580	273476757	ppeak853
chr7	2547686	2549863	ppeak855
chr8	137727908	137730085	ppeak856
chr8	138789089	138791266	ppeak857
chr6	100610276	100612452	ppeak858
chr8	76147881	76150057	ppeak859
chr16	35871101	35874011	ppeak86
chr14	132042417	132044591	ppeak861
chr15	68900521	68902695	ppeak862
chr2	7841591	7843764	ppeak863
chrX	97067738	97069911	ppeak864
chr13	122075873	122078045	ppeak866
chr13	136971128	136973300	ppeak867
chr15	88526952	88529124	ppeak868
chr8	128951602	128953773	ppeak870
chr7	39261166	39263336	ppeak873
chr2	134555525	134557694	ppeak874
chr1	7649997	7652165	ppeak875
chr4	84596899	84599067	ppeak876
chr5	47846498	47848666	ppeak878
chr13	137454619	137456786	ppeak879
chr2	132144950	132147116	ppeak881
chr13	117179595	117181758	ppeak882
chr2	108595826	108597989	ppeak883
chr2	141196638	141198801	ppeak884
chr1	267205659	267207821	ppeak887
chr6	87685809	87687971	ppeak889
chr11	12344306	12346467	ppeak890
chr13	138151042	138153203	ppeak891
chr8	56355678	56357839	ppeak894
chr14	24239050	24241210	ppeak895
chr13	81849550	81851709	ppeak896
chr5	12524903	12527061	ppeak901
chrX	35888765	35890923	ppeak902
chr2	30040033	30042190	ppeak903
chr6	74651841	74653998	ppeak904
chr16	49090058	49092214	ppeak908
chr7	58077899	58080055	ppeak909
chr12	36333111	36335266	ppeak910
chr4	89310247	89312402	ppeak911
chr4	34645759	34647913	ppeak912
chr6	164113376	164115530	ppeak913
chr13	157520755	157522908	ppeak914
chr6	134648282	134650434	ppeak917
chr11	62437999	62440150	ppeak918
chr9	74472725	74475622	ppeak92
chr11	33257504	33259654	ppeak920
chr12	18775911	18778061	ppeak921
chr13	22706297	22708446	ppeak923
chr15	44065627	44067776	ppeak924
chr14	108303539	108305686	ppeak926
chr5	87671209	87673356	ppeak927
chr8	11315322	11317469	ppeak928
chr9	72078287	72080434	ppeak929
chr1	131743946	131746092	ppeak930
chr13	167802228	167804374	ppeak932
chr5	34560798	34562942	ppeak935
chr7	23840428	23842572	ppeak936
chr3	42242054	42244196	ppeak941
chr6	7660112	7662254	ppeak942
chr4	36654274	36656411	ppeak955
chr8	55728063	55730200	ppeak956
chr9	72183712	72185849	ppeak957
chr9	99780138	99782275	ppeak958
chr1	215806220	215808356	ppeak959
chr1	221634216	221636352	ppeak960
chr7	7980289	7982425	ppeak961
chr10	31275859	31277994	ppeak962
chr9	33002615	33004750	ppeak964
chr9	87085349	87087484	ppeak965
chr8	67605681	67607814	ppeak967
chr13	204599826	204601957	ppeak968
chr9	7200473	7202604	ppeak970
chr6	63861972	63864101	ppeak973
chr14	61792786	61794914	ppeak974
chr2	77766765	77768893	ppeak975
chr12	43985277	43987404	ppeak976
chr1	9237543	9239667	ppeak981
chr18	28944964	28947087	ppeak986
chr1	162734960	162737082	ppeak987
chr13	201009500	201011622	ppeak988
chr14	3033493	3035615	ppeak989
chr2	125605685	125607807	ppeak990
chr11	49431119	49433240	ppeak992
chr13	177966306	177968427	ppeak993
chr2	125811394	125813515	ppeak994
chrX	108345557	108347677	ppeak999

## Sheet: pig_adipose_SE_s
chr14	56544078	56555665	ppeak10
chr7	86162705	86183468	ppeak102
chr12	35616330	35633323	ppeak111
chr1	143504933	143518851	ppeak115
chr1	269710510	269725874	ppeak13
chr2	65901083	65911227	ppeak132
chr5	9682284	9695972	ppeak135
chr6	12358155	12390361	ppeak146
chr9	41742081	41746306	ppeak149
chr6	47493992	47533155	ppeak15
chr6	92293259	92299508	ppeak173
chr2	6902362	6928532	ppeak174
chr14	81481936	81489085	ppeak180
chr12	47708418	47714610	ppeak182
chr1	223752442	223755656	ppeak184
chr12	22061961	22087156	ppeak19
chr4	34265516	34269171	ppeak195
chr16	71332603	71372097	ppeak21
chr14	113617124	113638325	ppeak219
chr1	107199318	107218560	ppeak227
chr12	22236187	22264845	ppeak23
chr17	49354235	49363397	ppeak243
chr10	23826168	23845219	ppeak246
chr1	236671590	236683289	ppeak249
chr12	4487874	4513204	ppeak253
chr5	22444636	22460989	ppeak258
chr18	45417380	45426020	ppeak304
chr5	18580784	18589327	ppeak315
chr4	93907455	93919331	ppeak32
chr3	10016806	10043784	ppeak33
chr14	129510366	129511524	ppeak333
chr3	97198999	97201568	ppeak345
chr15	7501684	7502936	ppeak346
chr16	51463904	51483084	ppeak354
chr12	48477255	48498596	ppeak36
chr11	25771566	25773429	ppeak369
chr7	92497368	92499089	ppeak379
chr4	93575094	93582375	ppeak38
chr2	6766162	6771564	ppeak39
chr15	120361054	120365018	ppeak392
chr5	3435261	3468887	ppeak4
chr9	104909720	104912843	ppeak42
chr2	75255091	75272898	ppeak43
chr1	268329034	268337482	ppeak430
chr10	33316577	33324315	ppeak432
chr14	41977575	41991737	ppeak438
chr12	53087265	53098751	ppeak44
chr5	11365677	11374931	ppeak441
chr10	56428027	56430870	ppeak444
chr15	132276253	132282840	ppeak45
chr13	82144884	82156023	ppeak452
chr9	65065180	65066789	ppeak458
chr13	68982129	68996579	ppeak470
chr5	64295773	64324394	ppeak48
chr1	21035935	21049411	ppeak482
chr13	125392681	125402438	ppeak49
chr13	92514467	92517880	ppeak518
chr12	1406198	1420052	ppeak52
chr13	2540847	2550111	ppeak535
chr12	52416773	52435401	ppeak54
chr4	98575814	98589811	ppeak55
chr2	65288425	65305615	ppeak6
chr6	32036500	32045584	ppeak634
chr9	55402573	55426208	ppeak658
chr14	30885405	30889964	ppeak66
chr4	99340811	99345479	ppeak713
chr14	40277285	40287159	ppeak714
chr12	36062027	36079206	ppeak72
chr1	208181832	208184170	ppeak754
chr7	86103823	86107761	ppeak759
chr7	100121447	100136564	ppeak8
chr2	66213194	66216967	ppeak81
chr6	72596820	72598317	ppeak815
chr16	51380488	51403920	ppeak87
chr6	64164701	64194034	ppeak9
chr2	76503772	76522023	ppeak90
chr2	9177235	9187778	ppeak95
chr12	20374685	20384102	ppeak96
chr11	66484144	66519424	ppeak98

## Sheet: pig_adipose_SE_u
chr4	80490073	80501424	ppeak100
chr18	46203756	46206524	ppeak101
chr17	33399060	33412362	ppeak103
chr5	21175161	21199414	ppeak105
chr3	68563279	68600049	ppeak106
chr3	17098481	17113106	ppeak108
chr2	134521235	134543995	ppeak109
chr12	3273318	3292692	ppeak11
chr13	32814923	32822011	ppeak110
chr2	143151615	143167879	ppeak112
chr11	17687747	17691861	ppeak113
chr6	45171918	45194395	ppeak114
chr6	58852855	58870893	ppeak117
chr4	599648	621762	ppeak118
chr6	85642147	85658586	ppeak119
chr5	76634743	76638678	ppeak120
chr3	42976353	42989392	ppeak121
chr1	183914618	183927541	ppeak122
chr1	9237973	9239819	ppeak123
chr7	92913135	92939009	ppeak124
chr2	150660543	150663081	ppeak127
chr1	147781165	147782823	ppeak128
chr1	239842215	239844347	ppeak130
chr9	41638904	41651683	ppeak133
chr5	61337850	61354515	ppeak134
chr6	53978799	53993658	ppeak137
chr6	15940961	15961646	ppeak14
chr13	109028299	109030857	ppeak140
chr1	57128292	57129819	ppeak142
chr7	2247206	2249751	ppeak143
chr15	109375018	109376779	ppeak144
chr2	287644	303348	ppeak145
chr18	553630	566330	ppeak147
chr6	75445232	75460434	ppeak148
chr5	21495000	21519219	ppeak150
chr3	111487452	111500246	ppeak151
chr12	46879333	46910364	ppeak152
chr5	7393177	7395043	ppeak153
chr6	75270260	75303704	ppeak156
chr6	63094335	63109789	ppeak157
chr5	64452850	64464406	ppeak158
chr3	18245714	18263434	ppeak159
chr14	81407215	81409414	ppeak160
chr10	42915091	42916315	ppeak161
chr15	132317618	132330070	ppeak162
chr4	35976843	35978063	ppeak163
chr2	60354982	60381168	ppeak164
chr2	98441255	98444489	ppeak165
chr12	51923685	51933048	ppeak167
chr12	52774952	52779802	ppeak170
chr14	41442089	41456056	ppeak171
chr10	69293806	69305510	ppeak172
chr3	9784935	9816743	ppeak176
chr3	111770748	111794873	ppeak177
chr12	14571184	14582921	ppeak178
chr5	17378641	17399886	ppeak18
chr12	4974916	4986116	ppeak181
chr6	62955408	62992811	ppeak183
chr2	74728817	74760440	ppeak185
chr5	63054529	63062803	ppeak186
chr3	17792107	17812128	ppeak188
chr5	9484507	9486494	ppeak189
chr10	17495822	17496997	ppeak190
chr6	54880149	54891654	ppeak194
chr1	159008791	159023218	ppeak196
chr7	53459209	53474023	ppeak198
chr1	269652905	269655499	ppeak199
chr12	53371640	53406850	ppeak2
chr5	23028971	23046815	ppeak201
chr3	1005060	1029481	ppeak204
chr6	49678898	49680716	ppeak206
chr4	16551690	16554285	ppeak207
chr2	135339047	135346522	ppeak210
chr12	19011093	19024376	ppeak211
chr2	141878183	141885680	ppeak212
chr6	53333202	53340589	ppeak214
chr9	17297166	17299172	ppeak216
chr6	36342221	36344284	ppeak217
chr14	48543591	48552450	ppeak218
chr12	18257451	18282280	ppeak22
chr3	39995518	40012455	ppeak220
chr3	75615950	75626341	ppeak221
chr18	50449214	50467656	ppeak223
chr9	46543717	46549970	ppeak225
chr7	75769768	75789972	ppeak226
chr3	8012094	8032832	ppeak228
chr9	134953976	134977255	ppeak230
chr14	114563424	114593201	ppeak231
chr13	90640538	90642234	ppeak233
chr10	17559027	17560308	ppeak234
chr2	27684474	27686055	ppeak235
chr6	52100941	52117798	ppeak236
chr2	77373662	77394379	ppeak237
chr6	63951422	63957834	ppeak238
chr15	48131153	48137116	ppeak240
chr10	39932166	39934014	ppeak241
chr17	51222247	51236999	ppeak242
chr9	104061	105900	ppeak244
chr12	38061371	38074972	ppeak245
chr2	51219648	51229672	ppeak248
chrUn_NW_018084979v1	3499493	3515953	ppeak25
chr3	41319089	41345232	ppeak250
chr8	87478695	87489414	ppeak251
chr6	63122374	63133277	ppeak256
chr4	3046047	3065969	ppeak257
chr6	59720389	59726574	ppeak262
chr3	39064634	39100100	ppeak264
chr2	81453552	81465754	ppeak265
chr13	96643050	96652803	ppeak266
chrUn_NW_018084833v1	1538544	1558226	ppeak267
chr2	4710197	4711965	ppeak268
chr12	45504912	45506380	ppeak269
chrM	637	14031	ppeak27
chr9	259413	269335	ppeak270
chr11	19099397	19119334	ppeak271
chr10	66264307	66285213	ppeak272
chr3	11408058	11435637	ppeak273
chr1	208148476	208154295	ppeak274
chr12	1319361	1320848	ppeak275
chr9	44582392	44597704	ppeak276
chr13	77749628	77751905	ppeak280
chr4	35767380	35769045	ppeak281
chr6	84049120	84051135	ppeak282
chr13	202886838	202897461	ppeak283
chr13	74705456	74706783	ppeak284
chr2	62250495	62252328	ppeak285
chr1	269863402	269882165	ppeak286
chr10	33013302	33022502	ppeak287
chr2	135282958	135284550	ppeak289
chr10	39875136	39879176	ppeak29
chr5	68678195	68679478	ppeak290
chr2	48665880	48667528	ppeak291
chr9	6678900	6689313	ppeak292
chr3	17487388	17497602	ppeak293
chr5	60766889	60778142	ppeak294
chr14	30320310	30337548	ppeak295
chr3	59707490	59709388	ppeak296
chr2	6678272	6685038	ppeak298
chr12	44949195	44965437	ppeak299
chrUn_NW_018085108v1	38779	51873	ppeak30
chr8	135420352	135432729	ppeak300
chr2	26873442	26881902	ppeak301
chr6	95060968	95082157	ppeak302
chr1	254207618	254214617	ppeak303
chr7	29714264	29731290	ppeak305
chr3	59318525	59350148	ppeak306
chr12	26995023	27005753	ppeak307
chr4	122504502	122514797	ppeak308
chr6	166515333	166534490	ppeak31
chr13	108425879	108436310	ppeak310
chr7	12720241	12730707	ppeak312
chr4	94649046	94670801	ppeak316
chr14	108032472	108034132	ppeak317
chr13	77180255	77182383	ppeak318
chr7	8515905	8519705	ppeak319
chrUn_NW_018084979v1	1900655	1902339	ppeak321
chr6	91407173	91408221	ppeak322
chr18	9581535	9582886	ppeak323
chr15	136438914	136452225	ppeak324
chr5	21327892	21337077	ppeak327
chr3	92695791	92698210	ppeak328
chr12	43904808	43927508	ppeak329
chr7	32278662	32290065	ppeak330
chr13	65758711	65761153	ppeak331
chr12	24302859	24306145	ppeak332
chr4	800675	824755	ppeak334
chr17	51929718	51939821	ppeak335
chr4	79873009	79874882	ppeak336
chrUn_NW_018084979v1	807814	821953	ppeak338
chr10	12755572	12757262	ppeak339
chr6	63628484	63675724	ppeak34
chr7	98461597	98474373	ppeak340
chr6	48834682	48844779	ppeak341
chr6	55926489	55940469	ppeak343
chr17	61529585	61531316	ppeak344
chr2	59276794	59284328	ppeak348
chr6	54053956	54072488	ppeak349
chr3	114713582	114723299	ppeak350
chr7	29671784	29681111	ppeak351
chr16	18415540	18416814	ppeak352
chr5	9321573	9322971	ppeak353
chr3	44147781	44162000	ppeak355
chr9	130828087	130855495	ppeak356
chr7	121121001	121133693	ppeak357
chr12	48146404	48168864	ppeak358
chr17	43710350	43711491	ppeak359
chrUn_NW_018084979v1	1845041	1856491	ppeak360
chr1	269444001	269454314	ppeak361
chr7	104007846	104009951	ppeak362
chr9	32810702	32812675	ppeak363
chr4	94496144	94498025	ppeak364
chr10	57828967	57830813	ppeak365
chr1	54596586	54598794	ppeak367
chr3	94011379	94013031	ppeak368
chr3	17742364	17778950	ppeak37
chr9	46062215	46063828	ppeak370
chr7	38213377	38224714	ppeak371
chr1	241567317	241570690	ppeak372
chr2	531546	534957	ppeak373
chr2	139781425	139783291	ppeak374
chr2	7390263	7392090	ppeak375
chr16	34691743	34703419	ppeak376
chr2	62434967	62454345	ppeak377
chr5	22020775	22022474	ppeak378
chr6	165133939	165136160	ppeak380
chr6	3849783	3863730	ppeak381
chr7	58065252	58079672	ppeak382
chr12	44892509	44907667	ppeak384
chr14	6653400	6660565	ppeak385
chrX	124470	126239	ppeak386
chr10	53313894	53323849	ppeak387
chr9	3143703	3152011	ppeak388
chr12	44604012	44617528	ppeak389
chr6	51807969	51822778	ppeak391
chr15	84891640	84900681	ppeak393
chr6	34922200	34934203	ppeak394
chr14	76498644	76511930	ppeak395
chr1	146007542	146016452	ppeak396
chr12	25049998	25058590	ppeak397
chr2	7829877	7843155	ppeak398
chr1	100698123	100700169	ppeak399
chr5	59727100	59739326	ppeak40
chr11	67564551	67566299	ppeak400
chr2	105201911	105203781	ppeak401
chr5	21624017	21626911	ppeak402
chr3	59184537	59202284	ppeak405
chr6	78059448	78071971	ppeak406
chr6	53753788	53764913	ppeak407
chr17	62631504	62657445	ppeak409
chr12	24795812	24818441	ppeak41
chrUn_NW_018084979v1	1284319	1309800	ppeak410
chr13	131260557	131271797	ppeak411
chr3	33654135	33656070	ppeak413
chr4	98794097	98805985	ppeak414
chr17	915901	917196	ppeak415
chr3	77855207	77857104	ppeak417
chr12	11965245	11967381	ppeak418
chr6	98813705	98815394	ppeak419
chr4	107731499	107737795	ppeak421
chr6	110121897	110125353	ppeak422
chr4	36653631	36655416	ppeak423
chr7	48042911	48050984	ppeak424
chr14	31507608	31520682	ppeak425
chr15	80572512	80582400	ppeak426
chrUn_NW_018085356v1	629277	640152	ppeak427
chr7	28911983	28920586	ppeak431
chr11	6761972	6763621	ppeak434
chr3	16363920	16377132	ppeak435
chr18	18819628	18822944	ppeak436
chr10	24602944	24623926	ppeak437
chr12	1197527	1206031	ppeak440
chr7	91927367	91959972	ppeak442
chr14	103217702	103239064	ppeak443
chr5	22868369	22875589	ppeak445
chr6	58333847	58335206	ppeak446
chr4	99112172	99123990	ppeak447
chr2	65172558	65174553	ppeak448
chr7	60822998	60824719	ppeak449
chr4	179942	206729	ppeak450
chr9	126346599	126348199	ppeak451
chr9	109556654	109558330	ppeak453
chr13	157490404	157505254	ppeak454
chr5	35670279	35672316	ppeak455
chr1	37192913	37203617	ppeak456
chr2	7875491	7884551	ppeak457
chr13	202464381	202465452	ppeak459
chr12	5513905	5542405	ppeak46
chr10	42012629	42014558	ppeak460
chr18	19141668	19143182	ppeak461
chr7	110442972	110464126	ppeak462
chr1	252323253	252325112	ppeak464
chr13	45400750	45402369	ppeak465
chr3	39771564	39786579	ppeak466
chr1	273810392	273830088	ppeak467
chr4	89278120	89312146	ppeak47
chr13	32006407	32040245	ppeak471
chr2	76687521	76694704	ppeak472
chr2	143207218	143210874	ppeak473
chr12	6047180	6056099	ppeak475
chr12	36333057	36334340	ppeak476
chr3	93371372	93373316	ppeak477
chr7	52793248	52794685	ppeak478
chr15	67408124	67409573	ppeak479
chr13	206535273	206547921	ppeak480
chr10	51614702	51621489	ppeak481
chr2	12530658	12532309	ppeak483
chr1	90299415	90300828	ppeak484
chr3	49464648	49471323	ppeak487
chr5	10087411	10101516	ppeak488
chr6	49306146	49330687	ppeak490
chr3	8833834	8844838	ppeak491
chr9	12850078	12858316	ppeak493
chr14	123344275	123346321	ppeak496
chr5	6570494	6576937	ppeak497
chr18	38264998	38285757	ppeak498
chr1	138340679	138342431	ppeak499
chr15	63496409	63506021	ppeak50
chr7	58172162	58176527	ppeak500
chr8	31206594	31208498	ppeak502
chr2	69716465	69725446	ppeak503
chr10	16740004	16741687	ppeak505
chr3	125351778	125353644	ppeak506
chr6	17433916	17435497	ppeak507
chr6	81590307	81610986	ppeak508
chr12	20975858	20987824	ppeak509
chr3	8356024	8375991	ppeak51
chr1	149516438	149517748	ppeak510
chr6	80023292	80036389	ppeak511
chr16	75259348	75261526	ppeak512
chr4	999656	1010988	ppeak513
chr7	20896953	20911589	ppeak514
chr14	55923298	55925738	ppeak515
chr12	16934969	16936621	ppeak516
chr4	97776585	97777785	ppeak517
chr15	121211254	121213269	ppeak519
chr17	43887634	43899004	ppeak520
chr6	83578700	83591232	ppeak521
chr18	38182176	38183978	ppeak522
chr9	705811	712295	ppeak523
chr1	130200984	130202512	ppeak524
chr17	34884564	34892889	ppeak525
chr9	19593840	19595076	ppeak526
chr7	13934432	13935828	ppeak527
chr13	31178733	31183922	ppeak528
chr1	121413262	121414446	ppeak529
chr6	56240436	56254222	ppeak53
chr12	34261937	34263617	ppeak532
chr7	92811178	92813019	ppeak533
chr9	46309055	46322504	ppeak534
chr4	94296926	94298560	ppeak536
chr6	27794703	27809329	ppeak538
chr7	59727619	59734080	ppeak541
chr15	139531973	139542965	ppeak542
chr6	3774287	3786943	ppeak543
chr14	40981446	40996927	ppeak545
chr17	19627222	19630537	ppeak546
chr1	45169659	45171254	ppeak547
chr17	28045622	28070747	ppeak548
chr6	18900759	18902335	ppeak549
chr1	235877356	235888109	ppeak550
chr7	98356691	98363326	ppeak551
chr3	1748186	1754194	ppeak552
chr6	94978768	94992037	ppeak553
chr7	78066239	78068160	ppeak554
chr6	74864424	74865598	ppeak555
chr3	38007035	38019721	ppeak556
chr14	45141898	45150503	ppeak557
chr12	59151275	59165340	ppeak560
chr3	56276575	56278237	ppeak562
chr6	4018652	4043568	ppeak563
chr18	19979941	20001532	ppeak565
chr2	79182498	79203371	ppeak566
chr18	19572316	19591234	ppeak568
chr6	48313363	48326387	ppeak569
chr12	22830140	22841872	ppeak570
chr3	31236529	31238357	ppeak572
chr7	68470253	68472018	ppeak573
chr8	84223544	84224948	ppeak574
chr9	494741	496057	ppeak575
chr12	43884361	43885876	ppeak576
chr13	46204286	46207538	ppeak577
chr4	103834408	103866744	ppeak578
chr7	97095430	97104961	ppeak579
chr3	670042	710795	ppeak58
chrUn_NW_018084979v1	2152502	2153919	ppeak580
chr12	50347279	50348680	ppeak581
chr12	53135784	53139085	ppeak582
chr6	43527395	43529032	ppeak583
chrX	20220880	20221891	ppeak584
chr14	121304873	121316895	ppeak585
chr1	90650215	90663947	ppeak586
chr1	270179030	270191112	ppeak587
chr1	265934228	265948774	ppeak588
chr6	28164621	28172499	ppeak589
chr6	52935724	52937992	ppeak59
chr17	47297164	47309843	ppeak590
chr3	127043290	127061573	ppeak591
chr4	98250762	98252272	ppeak593
chr18	40603697	40605417	ppeak594
chr14	114382482	114385762	ppeak595
chr16	36216217	36218363	ppeak596
chr9	47345155	47353284	ppeak597
chr6	53054888	53066609	ppeak598
chr13	197161243	197162665	ppeak599
chrUn_NW_018084833v1	697574	712851	ppeak600
chr5	69771411	69780219	ppeak602
chr15	88527422	88528847	ppeak603
chr6	63754220	63756012	ppeak604
chr14	36063514	36064634	ppeak605
chr12	52570541	52576927	ppeak606
chr6	83152265	83165075	ppeak608
chr7	10056847	10058776	ppeak609
chr7	74928817	74963264	ppeak61
chr7	33377600	33379648	ppeak610
chr2	7058627	7060326	ppeak611
chr14	134236673	134254798	ppeak612
chr2	4223454	4237082	ppeak613
chr18	54429647	54431426	ppeak614
chr1	167854826	167857637	ppeak615
chr6	167315577	167325664	ppeak616
chr6	70494762	70496210	ppeak617
chr7	117675801	117677451	ppeak618
chr11	16247456	16273502	ppeak619
chr7	340664	355366	ppeak620
chr6	71970737	71989126	ppeak621
chr14	48049179	48051233	ppeak622
chr10	31276000	31277463	ppeak623
chr2	9063989	9073476	ppeak624
chr3	80330707	80332322	ppeak625
chr1	77399454	77401744	ppeak626
chr1	190677323	190687634	ppeak628
chr13	110587566	110589034	ppeak629
chr14	112069852	112092951	ppeak63
chr2	5048513	5061706	ppeak630
chr4	2655812	2657423	ppeak631
chr12	16254388	16255522	ppeak633
chr7	29350608	29362805	ppeak635
chr4	128904022	128911514	ppeak636
chr14	32770360	32771659	ppeak637
chr1	75457168	75458741	ppeak638
chr3	113491566	113503891	ppeak639
chr12	4809082	4831026	ppeak64
chr7	2378628	2383039	ppeak640
chr13	34552950	34571652	ppeak641
chr3	41122427	41134283	ppeak642
chr12	1060694	1069925	ppeak643
chr3	80254091	80256182	ppeak644
chr4	125739799	125741234	ppeak645
chr3	28608042	28617932	ppeak646
chr15	75928141	75941355	ppeak647
chr12	61028600	61030103	ppeak649
chr4	56173652	56174839	ppeak650
chr14	105829777	105841571	ppeak651
chr11	651527	662247	ppeak653
chr6	106787984	106799052	ppeak654
chrUn_NW_018084874v1	879555	880559	ppeak655
chr3	19568387	19576912	ppeak656
chr7	19523813	19537495	ppeak657
chr15	101337311	101339003	ppeak659
chr17	43946702	43963192	ppeak661
chr3	18506052	18508012	ppeak662
chr15	138656956	138658596	ppeak663
chr2	141397776	141399202	ppeak664
chr2	15314612	15326911	ppeak666
chr14	50347445	50354395	ppeak668
chr12	147117	162103	ppeak669
chr12	52658783	52681050	ppeak67
chr3	8154670	8162701	ppeak671
chr2	2260826	2280789	ppeak672
chr8	135843946	135845763	ppeak673
chr2	11826723	11828363	ppeak674
chr14	134153948	134158855	ppeak675
chr5	7582535	7583929	ppeak676
chr17	39063926	39065439	ppeak677
chr13	115486899	115488766	ppeak678
chr12	52605169	52606905	ppeak679
chr6	164867809	164907485	ppeak68
chr9	102562582	102564516	ppeak680
chr1	119758556	119760044	ppeak681
chr3	8703059	8713967	ppeak684
chr3	112036684	112046685	ppeak685
chr2	140503457	140505222	ppeak686
chr2	52311257	52323319	ppeak687
chr13	14784242	14785411	ppeak688
chr6	53027673	53042022	ppeak689
chr5	63940720	63952465	ppeak69
chr1	189248239	189249938	ppeak690
chr3	39537906	39539256	ppeak691
chr13	202694387	202719143	ppeak692
chr15	137146027	137169016	ppeak693
chr2	103288023	103312935	ppeak694
chr15	80645309	80646510	ppeak695
chr6	69824050	69848283	ppeak696
chr7	20857181	20873597	ppeak697
chr6	48937915	48944513	ppeak698
chr4	6920117	6921830	ppeak699
chr2	59514635	59532529	ppeak7
chr14	61654118	61655590	ppeak700
chrUn_NW_018084804v1	138717	140406	ppeak701
chr2	140682419	140683755	ppeak702
chr10	17470607	17472273	ppeak703
chr2	7154455	7167069	ppeak704
chr1	273474781	273476763	ppeak706
chr1	218339258	218340992	ppeak707
chr10	50539574	50540881	ppeak708
chr12	60842756	60854919	ppeak71
chr2	71619074	71620674	ppeak710
chr13	167894865	167896694	ppeak712
chr6	32013050	32014759	ppeak715
chr7	16884160	16892544	ppeak716
chr8	11415147	11416534	ppeak717
chr3	37741546	37752855	ppeak718
chr5	80224214	80236858	ppeak719
chr14	67078983	67091659	ppeak720
chr13	157412070	157422779	ppeak721
chr3	77156373	77179103	ppeak722
chr3	93261561	93264889	ppeak723
chr14	29536902	29544302	ppeak724
chrX	35812921	35826439	ppeak725
chr14	48203803	48211008	ppeak726
chr15	130938758	130940155	ppeak727
chr5	88221987	88232359	ppeak728
chr17	11109083	11110596	ppeak729
chr15	81917013	81938783	ppeak73
chr5	15089918	15097677	ppeak730
chr4	87993176	87994789	ppeak731
chr12	21784068	21785438	ppeak732
chr18	9186295	9198459	ppeak734
chr6	145673735	145680544	ppeak735
chr6	44573064	44574762	ppeak736
chr3	31331815	31333620	ppeak737
chr2	65334993	65354980	ppeak738
chr15	66569351	66571048	ppeak739
chr2	9119284	9149106	ppeak74
chr13	31770622	31776747	ppeak740
chr3	114363395	114364714	ppeak741
chr4	3027480	3028853	ppeak742
chr7	97122361	97131760	ppeak743
chr3	74003612	74005724	ppeak744
chr12	14112196	14113564	ppeak745
chr7	93393362	93394493	ppeak746
chr4	36208230	36210365	ppeak747
chr5	87179677	87181207	ppeak748
chr9	6310453	6320266	ppeak749
chr13	201008742	201011033	ppeak75
chr7	57502695	57504880	ppeak750
chrUn_NW_018084857v1	3033	5668	ppeak751
chr13	52455239	52457738	ppeak752
chrX	124693629	124695044	ppeak753
chr12	18142289	18147477	ppeak755
chr2	76658029	76667874	ppeak756
chr17	62594585	62595764	ppeak757
chr1	235901693	235919862	ppeak758
chr7	23046657	23048189	ppeak762
chr7	113148077	113149661	ppeak763
chr18	8957464	8959146	ppeak764
chr3	42286505	42310472	ppeak765
chr17	26270028	26275689	ppeak766
chr12	45597009	45598091	ppeak767
chr13	11358528	11360577	ppeak768
chr3	39857959	39859008	ppeak769
chr5	101490329	101491553	ppeak770
chr4	90566562	90567429	ppeak771
chr13	34202556	34207238	ppeak772
chr3	77292869	77303901	ppeak773
chr16	3563804	3565198	ppeak774
chr15	136847224	136855047	ppeak775
chr15	82957420	82959135	ppeak776
chr2	13275323	13285187	ppeak777
chr9	117063164	117064966	ppeak778
chr8	83240024	83241802	ppeak781
chr1	169915044	169916890	ppeak782
chr16	28132975	28134323	ppeak783
chr4	89100017	89120094	ppeak784
chr7	76120139	76121895	ppeak786
chr11	5486692	5488121	ppeak787
chr2	10087074	10088236	ppeak788
chr12	49918122	49944864	ppeak789
chr5	59869466	59882340	ppeak79
chr3	38387342	38388621	ppeak790
chr2	136777656	136780505	ppeak792
chr9	93461783	93463446	ppeak793
chr2	72985036	72992731	ppeak794
chrX	5995098	5997040	ppeak795
chr1	115055048	115056868	ppeak797
chr5	76875491	76876654	ppeak800
chr5	22398669	22399989	ppeak801
chr13	69575563	69577531	ppeak802
chr5	64065551	64072618	ppeak803
chr2	75998855	76010831	ppeak804
chr7	56083597	56084983	ppeak805
chr8	84390440	84392170	ppeak806
chr3	8578731	8580340	ppeak807
chr7	75721335	75728175	ppeak808
chr15	929032	942742	ppeak809
chr3	111991869	112002582	ppeak810
chr9	6282512	6284155	ppeak811
chr6	1849465	1870058	ppeak812
chr15	3525190	3526521	ppeak813
chr2	76858734	76859828	ppeak814
chr6	28195295	28196915	ppeak817
chr5	16618209	16619903	ppeak818
chr3	76523397	76528345	ppeak819
chr10	32100923	32161786	ppeak82
chr16	22152000	22153457	ppeak820
chr5	19242928	19244704	ppeak821
chr7	75056232	75070886	ppeak822
chr14	110805015	110806977	ppeak823
chr14	115240703	115260217	ppeak824
chr8	112762109	112763331	ppeak825
chr2	65095680	65104198	ppeak826
chrX	124884390	124894217	ppeak827
chr3	42860791	42862735	ppeak828
chr6	96576694	96577761	ppeak829
chr13	208287885	208307728	ppeak83
chr5	22813209	22814352	ppeak830
chr2	75089289	75107885	ppeak831
chr6	84209139	84219385	ppeak832
chr16	52212014	52213920	ppeak833
chr15	7685483	7687184	ppeak834
chr2	5143586	5144757	ppeak835
chrX	125002129	125025060	ppeak836
chr7	68317808	68319505	ppeak837
chr14	131569919	131580676	ppeak838
chr2	29802	32549	ppeak839
chr2	58505566	58518356	ppeak840
chr8	72718370	72719561	ppeak841
chr4	47073379	47075494	ppeak842
chr1	9295899	9310928	ppeak844
chr3	39570725	39584925	ppeak845
chr13	206256719	206258223	ppeak847
chr12	47644147	47645234	ppeak849
chr14	103386087	103397274	ppeak850
chr4	95728986	95748060	ppeak86
chr11	16374456	16377054	ppeak91
chr3	18041977	18058044	ppeak92
chr12	5627041	5642622	ppeak93
chrUn_NW_018084833v1	389632	421134	ppeak94
chr12	18977764	18992735	ppeak97

## Sheet: pig_brain_BD_s
chr3	42860708	42862925	ppeak1001
chr6	135280479	135282695	ppeak1004
chr10	23966230	23969169	ppeak102
chr4	48555752	48557956	ppeak1039
chr6	140779696	140781899	ppeak1041
chr5	1568103	1570302	ppeak1056
chr1	257738499	257740693	ppeak1067
chr14	87226251	87228443	ppeak1073
chr4	14698591	14700783	ppeak1075
chr4	122503884	122506076	ppeak1076
chr12	52952112	52954301	ppeak1085
chr18	51801008	51803197	ppeak1086
chr5	78560527	78562716	ppeak1087
chr6	155800893	155803081	ppeak1092
chr4	9643640	9647252	ppeak11
chr1	191534034	191536946	ppeak111
chr8	99309198	99312108	ppeak113
chr13	140136142	140138311	ppeak1139
chr3	92696400	92698569	ppeak1140
chr3	4133849	4136755	ppeak115
chr15	110377245	110379411	ppeak1152
chr10	50539247	50541412	ppeak1154
chr18	18819630	18821795	ppeak1158
chr4	94496015	94498179	ppeak1162
chr13	185175769	185177931	ppeak1169
chr15	60053773	60055934	ppeak1173
chr10	14939435	14941595	ppeak1174
chr12	17208494	17211391	ppeak118
chr5	7087281	7089437	ppeak1194
chr13	124699693	124701848	ppeak1197
chr1	166697575	166701184	ppeak12
chr13	65758450	65761345	ppeak120
chr9	129579331	129581485	ppeak1202
chr6	165708448	165710600	ppeak1211
chr6	51779881	51782032	ppeak1215
chr7	2130076	2132970	ppeak122
chr7	1954537	1956686	ppeak1222
chr13	12335960	12338108	ppeak1224
chr13	52971784	52973932	ppeak1225
chr10	30427297	30430187	ppeak123
chr14	56545195	56547340	ppeak1233
chr2	120684527	120687416	ppeak124
chr2	100442460	100444601	ppeak1256
chr7	16890554	16892695	ppeak1257
chr3	72239690	72241830	ppeak1262
chr12	42601385	42603521	ppeak1279
chr1	219812479	219815361	ppeak128
chr11	23236959	23239093	ppeak1289
chr14	59112967	59115849	ppeak129
chr2	144928367	144931914	ppeak13
chr3	30270789	30273669	ppeak130
chr10	56427884	56430011	ppeak1314
chr12	11679584	11681707	ppeak1324
chr1	217000669	217002791	ppeak1328
chr10	23274374	23276496	ppeak1329
chr4	81935699	81937819	ppeak1336
chr5	27251474	27253589	ppeak1353
chr9	65065120	65067235	ppeak1355
chr4	16551541	16554414	ppeak136
chr11	39452142	39454255	ppeak1363
chr7	94789402	94791515	ppeak1368
chrX	48947742	48950615	ppeak137
chr5	48845770	48847881	ppeak1377
chr15	7500593	7503464	ppeak139
chr1	35696345	35698445	ppeak1419
chr18	10349535	10351634	ppeak1424
chr16	48403215	48405312	ppeak1430
chr5	92935716	92937810	ppeak1444
chr9	61018705	61020798	ppeak1453
chr6	151222954	151225046	ppeak1458
chr5	76636931	76639020	ppeak1475
chr4	62600266	62602352	ppeak1483
chr4	98171365	98174214	ppeak149
chr2	98442523	98444604	ppeak1501
chr3	63587223	63590070	ppeak151
chr5	36273016	36275093	ppeak1510
chr13	56804161	56806237	ppeak1516
chr13	125399316	125401388	ppeak1530
chr2	59531083	59533155	ppeak1533
chr14	103833957	103836797	ppeak154
chr7	37553980	37556820	ppeak155
chr9	60784879	60786947	ppeak1550
chr8	63602383	63605222	ppeak156
chr10	21775290	21778125	ppeak157
chr7	23163628	23165691	ppeak1573
chr1	4881651	4883711	ppeak1585
chr3	13563475	13566308	ppeak159
chrX	35812584	35814643	ppeak1594
chr1	137689277	137691332	ppeak1609
chr13	77179238	77181293	ppeak1610
chr13	37365554	37367608	ppeak1618
chr14	83315890	83318719	ppeak163
chr8	10401370	10404191	ppeak168
chr13	100441604	100444423	ppeak169
chr2	148232634	148234674	ppeak1691
chr14	66289394	66291432	ppeak1700
chr6	8468104	8470142	ppeak1702
chr9	60519864	60521901	ppeak1708
chr9	49108652	49111467	ppeak171
chr2	83690099	83692127	ppeak1745
chr1	180828381	180831184	ppeak176
chr6	92298670	92300692	ppeak1763
chr1	269453482	269455503	ppeak1767
chr18	34463123	34465911	ppeak178
chr3	94862480	94865268	ppeak179
chr12	23265908	23267921	ppeak1798
chr8	59987110	59990490	ppeak18
chr9	57965986	57967999	ppeak1802
chr9	13818611	13820621	ppeak1817
chr6	143272232	143275015	ppeak184
chr3	27491264	27493266	ppeak1846
chr8	93043692	93046470	ppeak186
chr8	112038892	112041668	ppeak188
chr13	90182430	90184427	ppeak1883
chr18	43725057	43728414	ppeak19
chr7	17349597	17351590	ppeak1911
chr2	88253649	88255637	ppeak1933
chr13	24574215	24576200	ppeak1946
chr12	31589048	31591031	ppeak1954
chr2	118728801	118731558	ppeak197
chr14	112849204	112851184	ppeak1974
chr18	33423301	33425280	ppeak1982
chr2	140439877	140442624	ppeak199
chr8	18524702	18528013	ppeak20
chr15	63494827	63497570	ppeak200
chr5	77075108	77077847	ppeak203
chr11	22631003	22633740	ppeak204
chr6	84800047	84802782	ppeak207
chr1	73548192	73550923	ppeak210
chr6	118085096	118088395	ppeak22
chr6	33732028	33734748	ppeak220
chr6	75015628	75018347	ppeak221
chr13	47566434	47569149	ppeak225
chr16	22151010	22153721	ppeak228
chr8	7421405	7424111	ppeak232
chr8	132464145	132466849	ppeak234
chr6	51872794	51875496	ppeak236
chr9	91032235	91034934	ppeak239
chr6	112626371	112629664	ppeak24
chr5	15089072	15091769	ppeak242
chr17	25680549	25683245	ppeak243
chr8	72587097	72589793	ppeak244
chr9	83418008	83420691	ppeak252
chr2	132535277	132537959	ppeak253
chr5	77125769	77128451	ppeak254
chr9	24772045	24775333	ppeak26
chr1	10224876	10228147	ppeak27
chr1	133014095	133016756	ppeak270
chr9	65502248	65504909	ppeak271
chr9	46888932	46891589	ppeak273
chr13	99502078	99504725	ppeak284
chr18	54428214	54430854	ppeak288
chr16	44414750	44417388	ppeak289
chr7	100120120	100123383	ppeak29
chr10	42012484	42015118	ppeak291
chr6	121379947	121382580	ppeak294
chr8	86878939	86882799	ppeak3
chr13	84633402	84636664	ppeak30
chr14	107135087	107137715	ppeak300
chr12	12340593	12343216	ppeak306
chr12	33536324	33538942	ppeak309
chr6	131916423	131919685	ppeak31
chr1	158336608	158339221	ppeak314
chr2	119720349	119722959	ppeak316
chr8	46077858	46080466	ppeak318
chr7	30811128	30813735	ppeak321
chrX	24408630	24411237	ppeak322
chr1	183914583	183917819	ppeak33
chr1	87116101	87118698	ppeak330
chr2	141480363	141482942	ppeak347
chr13	43131819	43135048	ppeak35
chr12	52416410	52418987	ppeak351
chr13	65636857	65639429	ppeak357
chr11	3124978	3127549	ppeak358
chr1	98540517	98543082	ppeak362
chr6	23277270	23279832	ppeak363
chr5	56059786	56062347	ppeak364
chr14	114227233	114229787	ppeak369
chr1	22240254	22242807	ppeak370
chr2	30040042	30042595	ppeak371
chr15	45189412	45191961	ppeak374
chr9	101459650	101462196	ppeak380
chr12	22235689	22238233	ppeak381
chr13	110050007	110053203	ppeak39
chr8	48020137	48022676	ppeak390
chr8	14756244	14760062	ppeak4
chr17	19627323	19630519	ppeak40
chr4	44599274	44601799	ppeak409
chr3	112065009	112067532	ppeak412
chr4	7813835	7816358	ppeak413
chr1	48884744	48887264	ppeak418
chr15	48053293	48055812	ppeak419
chr2	136777735	136780916	ppeak42
chr1	77399155	77401672	ppeak424
chr7	9852226	9854737	ppeak429
chr13	104458741	104461249	ppeak433
chr14	113637766	113640274	ppeak434
chr5	47686387	47688895	ppeak436
chr8	124148538	124151706	ppeak44
chr8	108914841	108917342	ppeak443
chr8	23457245	23460412	ppeak45
chr14	34472897	34475388	ppeak456
chr15	1715275	1717765	ppeak457
chr4	13445001	13448166	ppeak46
chr14	99927744	99930230	ppeak460
chr1	198341	200825	ppeak461
chr4	56173022	56175492	ppeak477
chr3	112251027	112253496	ppeak479
chr10	53351612	53354766	ppeak49
chr12	23361658	23364115	ppeak493
chr13	151428683	151431138	ppeak498
chr13	195233022	195235477	ppeak499
chr6	52935052	52937505	ppeak501
chr1	124041330	124043779	ppeak506
chr1	225040224	225042671	ppeak508
chr15	115093884	115097026	ppeak51
chr4	8669347	8671792	ppeak511
chr3	72793268	72795712	ppeak513
chr10	42945194	42947637	ppeak516
chr11	11083967	11086409	ppeak518
chr4	94929828	94932967	ppeak52
chr13	63317593	63320031	ppeak528
chr1	75169001	75171432	ppeak537
chr7	32787250	32790376	ppeak54
chr7	19523351	19525781	ppeak540
chr2	143889850	143892276	ppeak543
chr2	112815076	112817499	ppeak546
chr6	55373046	55375462	ppeak559
chr6	29590207	29593320	ppeak56
chr5	14100849	14103259	ppeak573
chr11	22517961	22520363	ppeak587
chr1	246547987	246550388	ppeak588
chr10	36740572	36743675	ppeak59
chr11	62437897	62440294	ppeak593
chr14	115586870	115589265	ppeak599
chr10	26634973	26638652	ppeak6
chr13	190284327	190287424	ppeak61
chr8	136555707	136558097	ppeak610
chr10	28508298	28510687	ppeak612
chr2	143498838	143501227	ppeak614
chr6	25932186	25935280	ppeak63
chr8	80302905	80305283	ppeak636
chr3	162597	165679	ppeak64
chr9	118975383	118977753	ppeak658
chr12	53086945	53089314	ppeak659
chr1	248031487	248033855	ppeak660
chr14	10468003	10470371	ppeak662
chr9	19945384	19947751	ppeak665
chr13	153995062	153998137	ppeak67
chr4	24647984	24650347	ppeak671
chr5	59734497	59736859	ppeak673
chr16	1520374	1522735	ppeak674
chr3	103814319	103816678	ppeak678
chr8	118202818	118205176	ppeak679
chr5	99083420	99086495	ppeak68
chr9	40628697	40631055	ppeak680
chr14	46407829	46410185	ppeak683
chr16	69652335	69654689	ppeak687
chr6	147319265	147321617	ppeak690
chr3	86782508	86784858	ppeak697
chr5	89583633	89587293	ppeak7
chr14	59301419	59304467	ppeak70
chr16	33776980	33779326	ppeak703
chr15	134620639	134622977	ppeak710
chr9	37613438	37615775	ppeak715
chr1	238824552	238826887	ppeak719
chr7	12720142	12723183	ppeak72
chr9	134583267	134585596	ppeak731
chr7	32289480	32291807	ppeak733
chr13	36220921	36223244	ppeak737
chr2	13206180	13209212	ppeak74
chr7	35913110	35915427	ppeak758
chr13	111850487	111853509	ppeak76
chr1	29625557	29627861	ppeak781
chr9	42982598	42984900	ppeak785
chr6	111147325	111149623	ppeak788
chr10	66488423	66490714	ppeak801
chr1	104814746	104817035	ppeak806
chr1	234368345	234370632	ppeak813
chr3	75624697	75626983	ppeak815
chr12	40533041	40536048	ppeak83
chr15	105969753	105972032	ppeak834
chr11	52156565	52159558	ppeak85
chr8	121656639	121658908	ppeak853
chr14	71485479	71487747	ppeak854
chr9	35441882	35444150	ppeak856
chr2	96275198	96277465	ppeak857
chr13	90640561	90643539	ppeak86
chr1	60941052	60944029	ppeak87
chr2	140807584	140809848	ppeak871
chr1	42729219	42731481	ppeak876
chrUn_NW_018084874v1	878739	881001	ppeak881
chr7	112160263	112162522	ppeak886
chr1	63293891	63296148	ppeak889
chr2	92551532	92554503	ppeak89
chr13	75506178	75508432	ppeak896
chr3	122717686	122721311	ppeak9
chr8	33635705	33637956	ppeak903
chr2	150660123	150662368	ppeak919
chr5	39314045	39316290	ppeak920
chr15	55490403	55492643	ppeak937
chr9	116147898	116150130	ppeak962
chr5	23130661	23132892	ppeak964
chr6	153685715	153687946	ppeak965
chr16	6383164	6386116	ppeak97
chr13	189714317	189716543	ppeak977
chr2	39703486	39705710	ppeak981
chr15	38407716	38410663	ppeak99
chr4	14932804	14935022	ppeak998

## Sheet: pig_brain_BD_u
chr12	919662	922607	ppeak100
chr2	135282297	135284514	ppeak1000
chr7	43883106	43885322	ppeak1005
chr6	49346358	49349298	ppeak101
chr18	43974169	43976383	ppeak1010
chr7	57888139	57890353	ppeak1011
chr1	265569554	265571767	ppeak1012
chr3	3773526	3775737	ppeak1015
chr6	17854398	17856609	ppeak1017
chr15	16358299	16360509	ppeak1019
chr1	18289077	18291286	ppeak1021
chr12	11965096	11967305	ppeak1022
chr14	50490881	50493090	ppeak1023
chr3	41283155	41285364	ppeak1025
chr14	49584229	49586436	ppeak1028
chr2	117235148	117237355	ppeak1029
chr17	62523918	62526857	ppeak103
chr6	88529675	88531882	ppeak1030
chr1	138340610	138342816	ppeak1031
chr12	1480821	1483027	ppeak1032
chr7	75707841	75710047	ppeak1036
chr4	68778777	68780979	ppeak1043
chr5	63794295	63796497	ppeak1044
chr15	57417786	57419987	ppeak1045
chr6	158905167	158907368	ppeak1047
chr8	138789071	138791272	ppeak1049
chr5	18445706	18448643	ppeak105
chr11	65515286	65517486	ppeak1050
chr7	3049877	3052077	ppeak1051
chrX	38928570	38930770	ppeak1053
chr6	32070190	32072389	ppeak1057
chr6	45343307	45345506	ppeak1058
chr2	126604975	126607173	ppeak1059
chr1	150709562	150712491	ppeak106
chr13	196644029	196646226	ppeak1060
chr14	103870353	103872550	ppeak1061
chr18	55643921	55646118	ppeak1062
chr13	70828559	70830755	ppeak1063
chr8	6021857	6024053	ppeak1064
chr10	59891925	59894120	ppeak1065
chr1	231142148	231144342	ppeak1066
chr12	32889782	32891976	ppeak1068
chr13	6984471	6986664	ppeak1070
chr10	39931960	39934152	ppeak1072
chrX	59747457	59750384	ppeak108
chr14	108303534	108305724	ppeak1082
chr14	40432814	40435002	ppeak1089
chr1	27248799	27251718	ppeak109
chr15	128306907	128309095	ppeak1091
chr7	13126200	13128388	ppeak1093
chr4	83677987	83680174	ppeak1094
chr5	63807072	63809259	ppeak1095
chr5	68166664	68168851	ppeak1096
chr3	42711160	42713346	ppeak1098
chr3	44021089	44023275	ppeak1099
chr9	135980986	135983900	ppeak110
chr13	163442806	163444991	ppeak1101
chr2	74836868	74839053	ppeak1102
chr4	3560530	3562715	ppeak1103
chr4	94296614	94298798	ppeak1105
chr10	14294370	14296552	ppeak1107
chr6	1494027	1496207	ppeak1112
chr18	52402556	52404735	ppeak1113
chr4	100837045	100839224	ppeak1114
chr6	100332208	100334386	ppeak1117
chr9	101718723	101720901	ppeak1118
chr2	132144922	132147099	ppeak1120
chr14	140635496	140637672	ppeak1123
chr5	69486712	69488887	ppeak1125
chr12	44975204	44977378	ppeak1128
chr2	77247141	77249315	ppeak1129
chr6	154156980	154159154	ppeak1130
chr18	6868837	6871010	ppeak1132
chr4	71607488	71609661	ppeak1133
chr17	10488073	10490245	ppeak1134
chr11	74492733	74494904	ppeak1135
chr17	62880518	62882689	ppeak1136
chr12	60921866	60924036	ppeak1138
chr4	65271297	65273466	ppeak1141
chr9	49371197	49373366	ppeak1143
chrUn_NW_018084833v1	889073	891242	ppeak1144
chr6	106418899	106421067	ppeak1146
chr3	117987047	117989214	ppeak1148
chr1	187413061	187415227	ppeak1149
chr12	4728602	4730768	ppeak1150
chr10	16739599	16741764	ppeak1153
chr12	16254220	16256385	ppeak1155
chr12	17304966	17307131	ppeak1156
chr16	4269628	4271793	ppeak1157
chr5	10251192	10253357	ppeak1159
chr2	69296385	69298549	ppeak1161
chr8	96691752	96693916	ppeak1164
chrX	82871806	82873970	ppeak1165
chr15	81986828	81988991	ppeak1166
chrX	124215597	124217760	ppeak1168
chr17	915503	917665	ppeak1170
chr5	47846438	47848600	ppeak1171
chr15	46757337	46759498	ppeak1172
chr4	110720534	110722694	ppeak1175
chr5	2979254	2981414	ppeak1176
chr11	5793739	5795898	ppeak1178
chr5	96297100	96299259	ppeak1179
chr9	28370987	28373146	ppeak1180
chr14	47637980	47640138	ppeak1182
chr2	65491744	65493902	ppeak1183
chr8	112761459	112763617	ppeak1185
chr1	182604232	182606389	ppeak1186
chr3	80255063	80257220	ppeak1188
chr7	40204832	40207729	ppeak119
chr1	242214650	242216806	ppeak1190
chr14	34608076	34610232	ppeak1192
chr9	7765894	7768050	ppeak1195
chr9	32810729	32812885	ppeak1196
chr15	20104236	20106391	ppeak1198
chr17	59647340	59649493	ppeak1203
chr1	253427737	253429889	ppeak1207
chr10	19842622	19844774	ppeak1208
chr4	67816061	67818213	ppeak1209
chr13	30659314	30662208	ppeak121
chr9	8070388	8072540	ppeak1212
chr2	77811256	77813407	ppeak1214
chr18	3904548	3906698	ppeak1217
chr3	34013909	34016059	ppeak1218
chr3	107541651	107543801	ppeak1219
chr1	39874429	39876578	ppeak1220
chr6	63287287	63289436	ppeak1221
chr9	121850214	121852363	ppeak1223
chr7	102216337	102218484	ppeak1227
chr8	11414841	11416987	ppeak1231
chr1	106683601	106685746	ppeak1232
chr2	59401234	59403379	ppeak1234
chr6	146209379	146211524	ppeak1236
chr1	237239056	237241199	ppeak1240
chr5	678901	681044	ppeak1243
chr6	3059071	3061214	ppeak1244
chr7	111866040	111868183	ppeak1246
chr8	12035550	12037693	ppeak1247
chr10	41177700	41179842	ppeak1251
chr6	79006398	79008540	ppeak1253
chr11	19218146	19220287	ppeak1254
chr14	66727416	66729557	ppeak1255
chr3	28932544	28934684	ppeak1261
chr14	48012736	48014875	ppeak1265
chr15	78850908	78853047	ppeak1266
chr4	12407446	12409585	ppeak1268
chr6	83918148	83920287	ppeak1269
chr12	23804477	23806615	ppeak1272
chr17	32022639	32024777	ppeak1273
chr10	57828545	57830682	ppeak1275
chr2	60057592	60059729	ppeak1276
chrUn_NW_018084979v1	2911666	2913802	ppeak1282
chr7	49622273	49624408	ppeak1285
chr8	83239739	83241874	ppeak1286
chr9	133186869	133189004	ppeak1288
chr18	25935813	25937947	ppeak1291
chr6	59448300	59450434	ppeak1294
chr6	167973419	167975553	ppeak1295
chr4	67465032	67467165	ppeak1297
chr5	45750010	45752143	ppeak1298
chr8	134136867	134139000	ppeak1299
chr14	141092997	141095129	ppeak1301
chr2	16121735	16123867	ppeak1303
chr5	104392897	104395028	ppeak1304
chr9	19546135	19548265	ppeak1307
chrX	88173006	88175136	ppeak1308
chr2	7841474	7843603	ppeak1310
chr16	36023860	36025987	ppeak1315
chr6	45519489	45521616	ppeak1316
chr7	20880524	20882651	ppeak1317
chr8	103047192	103049319	ppeak1318
chr1	273533096	273535220	ppeak1321
chr2	69828048	69830171	ppeak1325
chr6	68415050	68417173	ppeak1326
chr12	3642858	3644980	ppeak1330
chr2	108733091	108735213	ppeak1331
chr16	35150340	35152461	ppeak1334
chr13	197687820	197689940	ppeak1335
chr7	95365178	95367297	ppeak1338
chr2	75491556	75493674	ppeak1339
chr4	18924319	18926437	ppeak1340
chr17	57674596	57676713	ppeak1342
chrUn_NW_018084979v1	3460140	3462257	ppeak1345
chrX	124960407	124962523	ppeak1347
chr14	6186905	6189020	ppeak1349
chr18	20190373	20192488	ppeak1351
chr6	44773346	44775461	ppeak1354
chr1	129874163	129876277	ppeak1356
chr14	87742372	87744486	ppeak1357
chr14	121467832	121469946	ppeak1358
chr4	98826561	98828675	ppeak1359
chr5	59869523	59871637	ppeak1360
chr6	146547441	146549555	ppeak1361
chr8	75937828	75939942	ppeak1362
chr12	4346004	4348117	ppeak1364
chr13	152294324	152296437	ppeak1366
chr1	268815652	268817764	ppeak1370
chr1	35756711	35758822	ppeak1371
chr17	11108644	11110755	ppeak1372
chr2	51258232	51260343	ppeak1373
chr3	4899936	4902047	ppeak1374
chr4	716354	718465	ppeak1375
chr5	15028049	15030160	ppeak1376
chr5	51210584	51212695	ppeak1378
chr6	43527337	43530209	ppeak138
chr9	57127172	57129283	ppeak1382
chr3	56810237	56812347	ppeak1385
chr14	135952098	135954207	ppeak1387
chr2	125811379	125813488	ppeak1388
chr6	49844754	49846863	ppeak1389
chr15	110704619	110706727	ppeak1393
chrUn_NW_018085072v1	178351	180459	ppeak1394
chr9	67201263	67203370	ppeak1396
chr12	48141073	48143179	ppeak1397
chr6	36342225	36344331	ppeak1402
chr10	9979134	9981239	ppeak1403
chr4	15894906	15897011	ppeak1406
chr6	106917154	106919259	ppeak1408
chr1	12120974	12123078	ppeak1409
chr6	88292046	88294150	ppeak1410
chrUn_NW_018084979v1	1751233	1753336	ppeak1413
chr6	53442219	53444321	ppeak1416
chr14	132562276	132564377	ppeak1417
chr6	13455001	13457102	ppeak1418
chr2	25420957	25423817	ppeak142
chr17	37447076	37449176	ppeak1420
chr1	97510061	97512160	ppeak1421
chr9	114262243	114264342	ppeak1425
chr15	110788382	110790480	ppeak1428
chr13	204599843	204601940	ppeak1429
chr3	68230045	68232142	ppeak1432
chr7	51512797	51514894	ppeak1433
chr13	35178781	35180877	ppeak1435
chr15	67016587	67018683	ppeak1437
chr10	17558430	17560525	ppeak1438
chr18	36786230	36788325	ppeak1439
chr4	124229236	124231331	ppeak1440
chr2	45603888	45605982	ppeak1441
chr1	169595399	169597492	ppeak1446
chr14	10382251	10384344	ppeak1447
chr14	26609913	26612006	ppeak1448
chr15	46793257	46795350	ppeak1449
chr9	131889163	131892014	ppeak145
chr2	102436134	102438227	ppeak1450
chr7	68470133	68472226	ppeak1452
chr10	15722051	15724143	ppeak1454
chr12	51923149	51925241	ppeak1455
chr14	29558583	29560675	ppeak1456
chr2	113478987	113481079	ppeak1457
chr9	59542479	59544571	ppeak1459
chr8	112433675	112435766	ppeak1465
chrX	8193811	8195902	ppeak1466
chr4	1473522	1475612	ppeak1469
chr8	100860598	100863448	ppeak147
chr6	170401184	170403274	ppeak1470
chr8	110199667	110201756	ppeak1476
chr1	114749802	114751890	ppeak1477
chr12	51961112	51963961	ppeak148
chr4	106758236	106760324	ppeak1480
chr3	24174840	24176927	ppeak1481
chr15	126709988	126712074	ppeak1482
chr13	35290255	35292340	ppeak1484
chrUn_NW_018084833v1	1208782	1210867	ppeak1487
chr3	8404185	8406269	ppeak1488
chr7	121131847	121133931	ppeak1490
chr5	17207296	17209379	ppeak1492
chr6	67084861	67086944	ppeak1493
chr15	106409168	106411250	ppeak1498
chr6	98253177	98255259	ppeak1499
chrX	35865650	35869079	ppeak15
chr6	59637977	59640057	ppeak1503
chr14	60139841	60141920	ppeak1504
chr8	108724634	108726713	ppeak1505
chr12	3798102	3800180	ppeak1506
chr6	49992833	49994910	ppeak1511
chr6	57257163	57259240	ppeak1512
chrX	94884625	94886702	ppeak1514
chr2	65107630	65109706	ppeak1517
chr3	93371380	93373456	ppeak1518
chr1	255628853	255630928	ppeak1519
chr16	35871141	35873982	ppeak152
chr1	273474592	273476667	ppeak1520
chr1	17136553	17138627	ppeak1524
chr18	564383	566456	ppeak1528
chr1	104915107	104917179	ppeak1529
chr15	135592839	135594911	ppeak1531
chr4	63304971	63307043	ppeak1534
chr6	70345169	70347241	ppeak1535
chrUn_NW_018084833v1	1381658	1383730	ppeak1536
chr6	312555	314626	ppeak1538
chr15	80595657	80597727	ppeak1540
chr2	89045058	89047128	ppeak1542
chr4	89260478	89262548	ppeak1543
chr17	55390289	55392358	ppeak1544
chr2	77643003	77645072	ppeak1545
chr6	102332944	102335013	ppeak1548
chr2	62221436	62223504	ppeak1549
chr12	15730169	15732236	ppeak1551
chr13	198633343	198635410	ppeak1552
chr2	27684123	27686190	ppeak1556
chr9	9069172	9071239	ppeak1558
chr13	29995087	29997153	ppeak1560
chr5	9272802	9274868	ppeak1561
chr3	53489450	53491515	ppeak1564
chr7	49540107	49542171	ppeak1566
chr8	937842	939906	ppeak1567
chr13	44480258	44482321	ppeak1570
chr2	70096634	70098697	ppeak1571
chr8	109397443	109399506	ppeak1575
chr6	71027196	71029258	ppeak1578
chr11	2916052	2918113	ppeak1579
chr7	41088362	41091196	ppeak158
chr13	29752770	29754831	ppeak1580
chr13	136272938	136274999	ppeak1581
chr7	25233967	25236028	ppeak1583
chr8	1311341	1313402	ppeak1584
chr17	43809018	43811078	ppeak1588
chr9	105983991	105986051	ppeak1590
chr1	127935926	127937984	ppeak1595
chr8	134269421	134271479	ppeak1597
chrX	35888832	35890890	ppeak1598
chr14	50324760	50326817	ppeak1601
chr14	136478441	136480498	ppeak1602
chrX	10580696	10582753	ppeak1604
chr15	92330578	92332634	ppeak1605
chr4	118947079	118949135	ppeak1607
chr9	57016792	57018848	ppeak1608
chr13	90760237	90762292	ppeak1611
chr14	107713256	107715311	ppeak1613
chr17	30237321	30239376	ppeak1615
chr2	76339054	76341108	ppeak1620
chrX	96743529	96745583	ppeak1623
chr13	26668384	26670437	ppeak1626
chr16	72795803	72797856	ppeak1628
chr4	110196447	110198500	ppeak1630
chr8	81022871	81024924	ppeak1632
chr13	120727155	120729207	ppeak1634
chr15	44065590	44067642	ppeak1635
chr4	124618923	124620975	ppeak1636
chr7	33377789	33379841	ppeak1637
chr6	109216877	109218928	ppeak1639
chr9	6791722	6794546	ppeak164
chr13	140946767	140948817	ppeak1641
chr6	54564767	54566817	ppeak1642
chr13	19275054	19277103	ppeak1643
chr15	68049772	68051821	ppeak1644
chr5	31461353	31463402	ppeak1645
chr6	43847066	43849115	ppeak1647
chr11	18755658	18757706	ppeak1648
chr6	37667399	37670222	ppeak165
chr7	92928722	92930770	ppeak1650
chr8	84811069	84813117	ppeak1651
chr9	56748274	56750322	ppeak1652
chr13	75073771	75075818	ppeak1654
chr6	51254571	51256618	ppeak1657
chr6	55497511	55499558	ppeak1658
chrY	40209744	40212567	ppeak166
chr12	6481499	6483545	ppeak1661
chr10	19887828	19889873	ppeak1665
chr18	9529111	9531156	ppeak1666
chr3	92812510	92814555	ppeak1667
chr1	167007404	167009448	ppeak1669
chr1	269423415	269425459	ppeak1670
chr2	103822398	103824441	ppeak1676
chr7	97123046	97125089	ppeak1677
chr9	67314199	67316242	ppeak1678
chr1	7446565	7448607	ppeak1679
chr1	130991113	130993155	ppeak1680
chr13	206230071	206232113	ppeak1681
chr8	12967571	12969613	ppeak1682
chr9	81516482	81518524	ppeak1683
chrX	98180054	98182096	ppeak1684
chr10	53313914	53315955	ppeak1685
chr12	43031317	43033358	ppeak1686
chr1	161983136	161985176	ppeak1688
chr12	45359245	45361285	ppeak1689
chr6	60444566	60446606	ppeak1693
chr8	11315388	11317428	ppeak1694
chr13	11358323	11360362	ppeak1695
chr3	40693378	40695417	ppeak1697
chr6	53234858	53236896	ppeak1703
chr7	23796612	23798650	ppeak1704
chr7	56083548	56085586	ppeak1705
chrX	98024131	98026169	ppeak1706
chr11	78708124	78710161	ppeak1707
chr13	207675945	207677981	ppeak1709
chr9	106160939	106162975	ppeak1710
chr7	115369388	115371423	ppeak1713
chr1	189248316	189250350	ppeak1714
chr13	121564446	121566480	ppeak1715
chr7	23728026	23730060	ppeak1716
chr1	15328257	15330290	ppeak1717
chr14	51468271	51470304	ppeak1718
chr5	99954223	99956255	ppeak1721
chr1	267811881	267813912	ppeak1724
chr14	23446379	23448410	ppeak1725
chr2	49893186	49895217	ppeak1726
chr2	87497097	87499128	ppeak1727
chr3	107267962	107269993	ppeak1730
chr8	33176168	33178199	ppeak1731
chr1	100107281	100109311	ppeak1732
chr13	196599439	196601469	ppeak1735
chr2	119340174	119342204	ppeak1736
chr14	103094638	103096667	ppeak1737
chr17	10623710	10625739	ppeak1738
chr6	168492219	168494248	ppeak1739
chr1	223753429	223755457	ppeak1742
chr10	47687230	47689258	ppeak1743
chr6	59705003	59707031	ppeak1746
chr12	60774128	60776155	ppeak1747
chr7	75776653	75778680	ppeak1748
chr12	51195483	51197509	ppeak1750
chr14	6179095	6181121	ppeak1751
chr7	96585124	96587150	ppeak1753
chr7	116588816	116590842	ppeak1754
chr5	10319638	10321662	ppeak1756
chr7	115203260	115205284	ppeak1757
chr15	139457231	139459254	ppeak1758
chrX	5995121	5997144	ppeak1759
chr13	71645329	71647351	ppeak1761
chr18	19946304	19948326	ppeak1762
chr9	66248838	66250860	ppeak1764
chr1	184881034	184883055	ppeak1766
chr12	34261672	34263693	ppeak1768
chr4	158101	160122	ppeak1769
chr15	3524732	3526752	ppeak1771
chr17	60958999	60961019	ppeak1772
chr2	77729187	77731207	ppeak1773
chr7	64969440	64971460	ppeak1774
chr1	269400613	269402632	ppeak1775
chr4	111164381	111166400	ppeak1779
chr7	60009122	60011141	ppeak1780
chrX	101283095	101285114	ppeak1781
chr1	254207612	254209630	ppeak1782
chr13	52455942	52457960	ppeak1784
chr16	51906379	51908397	ppeak1785
chr12	5940377	5942394	ppeak1788
chr12	50347032	50349049	ppeak1789
chr11	24962917	24964933	ppeak1791
chr8	816945	818961	ppeak1792
chr8	32969542	32971557	ppeak1793
chrUn_NW_018084979v1	3283404	3285418	ppeak1797
chr12	47529073	47531086	ppeak1799
chr14	41231465	41234252	ppeak180
chr17	35984773	35986786	ppeak1800
chr18	39663188	39665201	ppeak1801
chr13	70416276	70418287	ppeak1806
chr6	56210786	56212797	ppeak1809
chr9	32126133	32128918	ppeak181
chr6	103964022	103966033	ppeak1810
chr8	131057621	131059631	ppeak1816
chrX	56471752	56473762	ppeak1818
chrX	515473	517482	ppeak1823
chr15	140222573	140224581	ppeak1826
chr6	94890810	94892818	ppeak1827
chr11	4053272	4055279	ppeak1828
chr16	52780471	52782477	ppeak1831
chr7	52353358	52355364	ppeak1832
chrX	41579469	41581475	ppeak1833
chr3	41343684	41345689	ppeak1835
chr5	59727879	59729884	ppeak1836
chrUn_NW_018084833v1	613508	615513	ppeak1838
chr15	7685352	7687356	ppeak1840
chr5	87671224	87673228	ppeak1841
chr16	32129521	32131523	ppeak1845
chr4	34645712	34647714	ppeak1848
chr6	7660123	7662125	ppeak1849
chr7	39137583	39139585	ppeak1851
chr11	79025948	79027949	ppeak1853
chr14	57480553	57482554	ppeak1856
chr17	61626489	61628490	ppeak1857
chr2	15381265	15383266	ppeak1858
chr5	17180290	17182291	ppeak1860
chr5	43912921	43914922	ppeak1861
chr6	79380023	79382024	ppeak1862
chr12	18056345	18058345	ppeak1863
chr14	76699671	76701671	ppeak1865
chr2	16568659	16570659	ppeak1867
chr3	109410778	109412778	ppeak1868
chr1	216493638	216495637	ppeak1870
chr13	160396954	160398953	ppeak1871
chr13	175348236	175350235	ppeak1872
chr17	39705048	39707047	ppeak1873
chr7	19702122	19704121	ppeak1875
chr1	179712638	179714635	ppeak1880
chr1	209180896	209182893	ppeak1881
chr13	3991911	3993908	ppeak1882
chr13	109229772	109231769	ppeak1884
chr2	80395873	80397870	ppeak1885
chr4	968593	970590	ppeak1886
chr6	54210125	54212122	ppeak1887
chr1	111374982	111376978	ppeak1888
chr13	205561522	205563518	ppeak1892
chr14	25143451	25145447	ppeak1894
chr3	8509321	8511317	ppeak1896
chr1	236340131	236342126	ppeak1899
chr12	20507846	20509841	ppeak1900
chr13	100251858	100253853	ppeak1902
chr6	135605741	135607735	ppeak1905
chr15	106996257	106998250	ppeak1908
chr6	53064824	53066817	ppeak1910
chrX	124467	126460	ppeak1913
chr1	251977111	251979103	ppeak1914
chr5	3365295	3367287	ppeak1915
chrUn_NW_018085018v1	93009	95001	ppeak1917
chr4	91258529	91260520	ppeak1920
chr14	39326366	39328356	ppeak1921
chr18	48996928	48998918	ppeak1923
chr5	6986815	6988805	ppeak1925
chrX	50862689	50864679	ppeak1928
chr5	8985718	8988483	ppeak193
chr1	252651281	252653269	ppeak1931
chr9	98437157	98439145	ppeak1935
chr10	19045620	19047607	ppeak1936
chr12	33375222	33377209	ppeak1937
chr13	202942390	202944377	ppeak1938
chr1	28300330	28303093	ppeak194
chr4	106625788	106627775	ppeak1940
chr1	239491640	239493626	ppeak1941
chr10	48358819	48360805	ppeak1942
chr6	88786180	88788165	ppeak1947
chr9	77197250	77199235	ppeak1948
chrUn_NW_018084833v1	225881	227866	ppeak1949
chr12	13654193	13656177	ppeak1950
chr6	52597659	52599643	ppeak1952
chr7	30319939	30321923	ppeak1953
chr5	34425877	34427860	ppeak1957
chr9	26559156	26561139	ppeak1959
chr15	77328030	77330012	ppeak1961
chr18	23530559	23532541	ppeak1963
chr2	144239616	144241598	ppeak1964
chr13	14041681	14043662	ppeak1969
chr8	70787984	70789965	ppeak1971
chr8	114251569	114253550	ppeak1972
chr1	215806447	215808427	ppeak1973
chr14	113230452	113232432	ppeak1975
chr16	50989005	50990985	ppeak1976
chr2	69235359	69237339	ppeak1977
chrX	113931697	113934445	ppeak198
chr13	144903082	144905061	ppeak1980
chr18	26623334	26625313	ppeak1981
chr6	157843427	157845406	ppeak1985
chrUn_NW_018085316v1	44091	48005	ppeak2
chr2	105201347	105204086	ppeak202
chr2	25603566	25606303	ppeak205
chr2	1277681	1280417	ppeak206
chr1	239841570	239844304	ppeak208
chrX	117154319	117157048	ppeak212
chr1	36064974	36067702	ppeak213
chr18	47296579	47299305	ppeak214
chr2	26873196	26875922	ppeak215
chr18	5474097	5476821	ppeak216
chr6	43084193	43086916	ppeak217
chr4	39111317	39114035	ppeak223
chr8	87773166	87775880	ppeak226
chr3	68496238	68498951	ppeak227
chr16	61720888	61723595	ppeak230
chr5	49159042	49161748	ppeak231
chr5	80234026	80236729	ppeak235
chr7	4511790	4514491	ppeak237
chr14	32769244	32771942	ppeak240
chr7	75592508	75595200	ppeak245
chr1	153391300	153393990	ppeak247
chr13	157270578	157273268	ppeak248
chr2	4709549	4712230	ppeak255
chr6	101756118	101758798	ppeak256
chrX	41851290	41853966	ppeak259
chr15	109374732	109377399	ppeak265
chr9	55620356	55623023	ppeak267
chr8	30023579	30026245	ppeak268
chr11	22073936	22076600	ppeak269
chr11	49029131	49031787	ppeak275
chr7	1791264	1793920	ppeak276
chr13	45786483	45789137	ppeak277
chr10	43516320	43518973	ppeak278
chr1	240494116	240496765	ppeak282
chr4	96009836	96012479	ppeak287
chr13	70538276	70540910	ppeak292
chr4	72752514	72755146	ppeak295
chr15	124212264	124214895	ppeak297
chr1	30530959	30533584	ppeak301
chr17	40097133	40099758	ppeak302
chr4	78979741	78982366	ppeak304
chr7	15794084	15796703	ppeak308
chr15	139471308	139473923	ppeak312
chr7	76062538	76065144	ppeak323
chr13	18760471	18763076	ppeak324
chr7	8517903	8520508	ppeak325
chr15	45632707	45635311	ppeak326
chr12	15659722	15662323	ppeak327
chr3	74003568	74006168	ppeak328
chr14	61665920	61668517	ppeak332
chrX	58182320	58184915	ppeak335
chr1	183418853	183421446	ppeak336
chr10	53321998	53324591	ppeak337
chr4	41803036	41805620	ppeak344
chr14	42190629	42193208	ppeak346
chr9	130784473	130787052	ppeak348
chr17	36199213	36201791	ppeak349
chr15	104781194	104784423	ppeak36
chr13	83818085	83820651	ppeak361
chr8	83676649	83679209	ppeak365
chr6	56240773	56243326	ppeak372
chr12	47837211	47839759	ppeak375
chr15	76901628	76904175	ppeak376
chr5	60775613	60778160	ppeak377
chr6	65846617	65849161	ppeak382
chr6	101420109	101422652	ppeak383
chr13	129502279	129504821	ppeak384
chr10	67080636	67083177	ppeak386
chr12	38073163	38075703	ppeak388
chr8	116543617	116546154	ppeak395
chr3	668821	671355	ppeak398
chrY	9169091	9171624	ppeak401
chr18	4052849	4055380	ppeak403
chr9	7606704	7609234	ppeak404
chr4	77182947	77185475	ppeak405
chr17	62504421	62506948	ppeak406
chr1	230905938	230908464	ppeak407
chr12	45395515	45398039	ppeak410
chrX	6409732	6412254	ppeak415
chrUn_NW_018084979v1	3538765	3541284	ppeak421
chr14	107295332	107297849	ppeak425
chr11	44185344	44188523	ppeak43
chr14	108753022	108755532	ppeak431
chr6	167268730	167271239	ppeak432
chr12	8243871	8246376	ppeak439
chr2	75261078	75263580	ppeak441
chr6	102877538	102880035	ppeak445
chrX	100827046	100829538	ppeak455
chr2	1558646	1561130	ppeak462
chr15	132356463	132358946	ppeak464
chrX	19506675	19509155	ppeak468
chr1	159529950	159532424	ppeak472
chr7	36975210	36977680	ppeak478
chr2	61271068	61273535	ppeak481
chr7	91590428	91592893	ppeak482
chr2	2020038	2022501	ppeak484
chr9	45310046	45312509	ppeak486
chr10	59629081	59631543	ppeak487
chr12	14112149	14114611	ppeak488
chr15	72695449	72697907	ppeak492
chr14	127500599	127503056	ppeak494
chr11	20904800	20907256	ppeak496
chr13	117179576	117182031	ppeak497
chrX	122120849	122124631	ppeak5
chr14	131205121	131208271	ppeak50
chr13	68994659	68997112	ppeak500
chr9	65545522	65547975	ppeak502
chr4	64953427	64955879	ppeak503
chr6	166137516	166139966	ppeak505
chr14	5836369	5838817	ppeak507
chr6	28194800	28197244	ppeak514
chr8	4218154	4220598	ppeak515
chr3	6140726	6143169	ppeak517
chr17	50548648	50551090	ppeak519
chr9	3418214	3420656	ppeak520
chr8	1063031	1065472	ppeak522
chr1	39038816	39041256	ppeak525
chr1	98014118	98016557	ppeak526
chr7	2247235	2249674	ppeak527
chr13	67870679	67873114	ppeak529
chr7	88105227	88107662	ppeak531
chr8	28801191	28803626	ppeak532
chr14	13378991	13381425	ppeak534
chr15	133119786	133122219	ppeak535
chr4	100441763	100444195	ppeak536
chr18	42650476	42652903	ppeak542
chr12	18223743	18226168	ppeak544
chr3	85648836	85651258	ppeak547
chr13	74930644	74933065	ppeak548
chr3	97200450	97202869	ppeak552
chr13	122075585	122078003	ppeak554
chr15	3359264	3361680	ppeak557
chr5	63770204	63772620	ppeak558
chr2	77463170	77465585	ppeak561
chrX	16573524	16575939	ppeak564
chr11	12815247	12817660	ppeak565
chr3	113501991	113504403	ppeak569
chr9	45902150	45905260	ppeak57
chr5	64049574	64051985	ppeak571
chr2	60232595	60235003	ppeak577
chr1	181515912	181518315	ppeak583
chr3	77420581	77422984	ppeak586
chr16	5979170	5981571	ppeak589
chr18	31888023	31890422	ppeak591
chr16	64250702	64253099	ppeak594
chr1	110718765	110721161	ppeak595
chr6	98813282	98815677	ppeak600
chr2	7443720	7446114	ppeak602
chr12	6678819	6681212	ppeak604
chr8	111717492	111719885	ppeak606
chr8	131502276	131504669	ppeak607
chr16	30305143	30307535	ppeak608
chr1	270273716	270276105	ppeak611
chr6	20222797	20225184	ppeak618
chr14	10195023	10197409	ppeak620
chr3	31880111	31882497	ppeak621
chr6	42559056	42561442	ppeak622
chr6	76011806	76014190	ppeak626
chr2	58951397	58953780	ppeak628
chr7	16944348	16946731	ppeak630
chr12	41725567	41727947	ppeak632
chr14	108885809	108888188	ppeak634
chrX	17560382	17562755	ppeak645
chr3	41070881	41073253	ppeak648
chr4	10182100	10184471	ppeak651
chr4	34220931	34223302	ppeak652
chr6	47301058	47303429	ppeak653
chr2	69095372	69097742	ppeak654
chr8	76147732	76150102	ppeak657
chr12	1417951	1420319	ppeak661
chr3	80330278	80332645	ppeak664
chr3	126218582	126220947	ppeak668
chr10	69293557	69295916	ppeak677
chr10	11465780	11468137	ppeak681
chr9	124696065	124698422	ppeak682
chr2	46336617	46338972	ppeak685
chr3	48647657	48650012	ppeak686
chr14	133542239	133544591	ppeak689
chr13	69575191	69577542	ppeak691
chr14	132042401	132044752	ppeak692
chr17	32283550	32285901	ppeak693
chr6	52551906	52554256	ppeak698
chr2	131369596	131371944	ppeak699
chr10	17470520	17472866	ppeak702
chr14	23117888	23120232	ppeak705
chr1	83849140	83851483	ppeak707
chr3	46546022	46548362	ppeak708
chr1	164655059	164658101	ppeak71
chr7	78065999	78068337	ppeak711
chr13	34098381	34100717	ppeak716
chr15	95247879	95250214	ppeak721
chr3	92988685	92991020	ppeak722
chr1	80243518	80245852	ppeak723
chrX	113529913	113532244	ppeak726
chr13	138150822	138153152	ppeak727
chr4	37900066	37902396	ppeak728
chr1	130385577	130387905	ppeak732
chrX	124566003	124568330	ppeak734
chr2	124199193	124201518	ppeak736
chr2	65095678	65098001	ppeak738
chr7	663233	665556	ppeak741
chr7	116768772	116771095	ppeak743
chr7	117585319	117587641	ppeak747
chr15	61140349	61142670	ppeak748
chrUn_NW_018084979v1	1637157	1639476	ppeak751
chr1	2600766	2603084	ppeak752
chr14	60444649	60446966	ppeak756
chr7	89395619	89397936	ppeak759
chr2	129806615	129808930	ppeak760
chr13	71203420	71205734	ppeak763
chr8	104270617	104272931	ppeak765
chrX	55629679	55631992	ppeak766
chr5	68822084	68824396	ppeak768
chr7	67592907	67595219	ppeak769
chr13	71760103	71763119	ppeak77
chr15	87378265	87380576	ppeak770
chr6	111235113	111237422	ppeak774
chr1	166464993	166467301	ppeak775
chr12	43472673	43474981	ppeak776
chr9	102868616	102870922	ppeak778
chr13	123648315	123651331	ppeak78
chr3	109104195	109106498	ppeak784
chr7	60298617	60300915	ppeak789
chr13	136971042	136973339	ppeak790
chr3	86535186	86537482	ppeak791
chr17	62893213	62895505	ppeak800
chr16	62627657	62629948	ppeak802
chr1	16609904	16612194	ppeak804
chrX	37534530	37536820	ppeak805
chr2	76608124	76610413	ppeak807
chr11	20995515	20997803	ppeak808
chr12	14634536	14636824	ppeak809
chr6	55386586	55389597	ppeak81
chr14	61653295	61655583	ppeak811
chr5	101692031	101694319	ppeak812
chr15	78196270	78198556	ppeak814
chr15	101497950	101500959	ppeak82
chr4	129904877	129907160	ppeak820
chrX	98103868	98106151	ppeak821
chr1	140675491	140677773	ppeak822
chrX	98621670	98623951	ppeak826
chr12	46709247	46711527	ppeak827
chrX	110783390	110785670	ppeak831
chr13	94155505	94157784	ppeak833
chrUn_NW_018085316v1	48732	51010	ppeak836
chr14	10427589	10429866	ppeak838
chr1	90743915	90746191	ppeak839
chr1	268640955	268643231	ppeak840
chr16	67479881	67482157	ppeak841
chr14	72382532	72384807	ppeak843
chr7	38079828	38082103	ppeak844
chr13	65919260	65921533	ppeak845
chr11	5486195	5488467	ppeak847
chr15	62262839	62265110	ppeak849
chr4	111823956	111826226	ppeak850
chr8	139616	141884	ppeak855
chr7	53639754	53642021	ppeak858
chr2	62250309	62252575	ppeak862
chrUn_NW_018084979v1	2071880	2074146	ppeak864
chr13	180570617	180572882	ppeak865
chr2	60566025	60568290	ppeak866
chr6	29023725	29025990	ppeak867
chr6	124034914	124037179	ppeak868
chr13	110324793	110327057	ppeak870
chr6	48711548	48713810	ppeak878
chr12	52925372	52927631	ppeak885
chr2	69224081	69226338	ppeak891
chr12	27302411	27304667	ppeak892
chr3	41207372	41209628	ppeak893
chr4	15262744	15264999	ppeak895
chr2	151618658	151620910	ppeak900
chr13	1610905	1613156	ppeak901
chr6	81722158	81724409	ppeak902
chr12	239647	241897	ppeak904
chr4	127035718	127037968	ppeak906
chr7	53888800	53891049	ppeak907
chr12	15164006	15166254	ppeak908
chr16	68449340	68452310	ppeak91
chr18	37691073	37693321	ppeak911
chr15	32599599	32601846	ppeak912
chr8	47133503	47135750	ppeak913
chr9	103962910	103965157	ppeak914
chr13	108333348	108335594	ppeak915
chr18	9939662	9941908	ppeak916
chr6	51372280	51374526	ppeak917
chr17	33608710	33611675	ppeak92
chr9	124282353	124284598	ppeak921
chr10	1149472	1151716	ppeak922
chr12	43554078	43556322	ppeak923
chr13	35567762	35570006	ppeak924
chr5	87352311	87354555	ppeak925
chr7	9345381	9347625	ppeak926
chr9	2078165	2080408	ppeak928
chr12	23665960	23668202	ppeak929
chr9	20720629	20722871	ppeak933
chr1	142499623	142501863	ppeak936
chr7	92643319	92645559	ppeak938
chr12	5117424	5120387	ppeak94
chr14	126935864	126938102	ppeak942
chr16	74729016	74731253	ppeak943
chr9	44512749	44514986	ppeak946
chr13	58641743	58643979	ppeak947
chr3	59707305	59709539	ppeak950
chr1	167853679	167855912	ppeak952
chr15	135441325	135443558	ppeak953
chr6	49905468	49907701	ppeak955
chr13	79708457	79710689	ppeak958
chr8	32698670	32700902	ppeak961
chr1	274224032	274226262	ppeak966
chr13	23236853	23239082	ppeak970
chr6	34317688	34319917	ppeak974
chr16	23766579	23768806	ppeak976
chr1	251066957	251069182	ppeak978
chr13	202895470	202897695	ppeak979
chr5	390096	392321	ppeak980
chr2	76679265	76681488	ppeak984
chr4	98250650	98252873	ppeak985
chr17	48199128	48201350	ppeak987
chr10	12854784	12857005	ppeak988
chr12	5761955	5764176	ppeak989
chr5	7582277	7584498	ppeak990
chr3	17750047	17752267	ppeak993
chr7	75611671	75613891	ppeak995
chr6	19850324	19852543	ppeak997
chr1	164997650	164999867	ppeak999

## Sheet: pig_brain_SE_s
chr2	6717317	6861873	ppeak1
chr7	100120847	100136510	ppeak103
chr14	30878127	30889964	ppeak106
chr14	113556142	113677315	ppeak12
chr4	94053580	94064161	ppeak120
chr12	1406102	1422278	ppeak121
chr10	53314011	53353126	ppeak122
chr14	75154476	75189867	ppeak125
chr2	77153423	77220093	ppeak13
chr17	40046884	40099638	ppeak133
chr9	46145599	46198113	ppeak144
chr1	269710398	269747976	ppeak164
chr9	52594877	52672560	ppeak167
chr17	49354805	49392246	ppeak17
chr6	52922178	52938068	ppeak171
chr15	132317639	132342274	ppeak173
chr5	3419143	3478180	ppeak2
chr1	208173904	208193953	ppeak219
chr2	66020542	66088012	ppeak22
chr12	53087223	53098916	ppeak230
chr6	84705304	84738780	ppeak234
chr14	56543932	56580060	ppeak24
chr2	100427186	100448495	ppeak241
chr4	90258229	90294810	ppeak248
chr2	75228182	75272948	ppeak28
chr13	32722162	32749145	ppeak295
chr15	7494402	7585807	ppeak3
chr9	104880484	104913250	ppeak30
chr4	93575084	93625326	ppeak32
chr5	64027177	64073258	ppeak334
chr7	86145609	86175785	ppeak345
chr7	54942122	54987849	ppeak353
chr13	119641904	119660335	ppeak414
chr2	96066098	96102460	ppeak43
chr6	49650833	49682746	ppeak44
chr14	56424769	56454137	ppeak441
chr3	49790258	49820336	ppeak46
chr14	81577921	81591922	ppeak462
chr2	98441081	98445245	ppeak482
chr2	141465131	141574656	ppeak5
chr5	14146088	14172495	ppeak511
chr4	110801930	110845753	ppeak538
chr14	56594351	56652385	ppeak54
chr12	34140986	34270226	ppeak6
chr2	59522861	59532903	ppeak67
chr6	13677001	13688593	ppeak688
chrUn_NW_018084833v1	1203865	1216502	ppeak709
chr3	3993214	4000134	ppeak71
chr12	22286364	22328809	ppeak79
chr1	166465096	166585828	ppeak8
chr15	132269584	132283016	ppeak803
chr6	94960228	94980452	ppeak816
chr1	104832348	104847148	ppeak905
chr4	93666723	93694189	ppeak910
chr14	120617298	120661498	ppeak94

## Sheet: pig_brain_SE_u
chr12	46709240	46769609	ppeak100
chr11	39426995	39463509	ppeak1001
chr7	29671814	29695210	ppeak1002
chr1	167854772	167870399	ppeak1003
chr5	67940091	67965539	ppeak1004
chr15	108974788	108999707	ppeak1006
chr15	101491139	101511799	ppeak1007
chr12	61297216	61321177	ppeak1008
chr1	77780000	77810572	ppeak1009
chr6	52179395	52212894	ppeak1010
chr6	48987788	49020649	ppeak1011
chr2	4709825	4711282	ppeak1012
chr12	20622930	20639079	ppeak1013
chr18	49149936	49202896	ppeak1014
chr13	82069080	82111182	ppeak1015
chr3	9666423	9693584	ppeak1016
chr6	25853953	25889593	ppeak1018
chr13	53105494	53123625	ppeak1019
chr6	166520633	166554008	ppeak102
chr6	28475541	28509556	ppeak1020
chr14	10995003	11007496	ppeak1023
chr4	8014505	8026439	ppeak1024
chr13	121946134	121958399	ppeak1025
chr13	157490400	157522807	ppeak1026
chr6	47869177	47887439	ppeak1027
chr17	1481977	1515926	ppeak1028
chr1	2392577	2436301	ppeak1029
chr11	78424426	78453764	ppeak1030
chr2	51219629	51231410	ppeak1031
chr6	91406945	91423303	ppeak1032
chr3	9784682	9817146	ppeak1033
chr13	144925412	144951005	ppeak1034
chr7	104007461	104016102	ppeak1035
chr14	46184364	46226540	ppeak1036
chr17	62875390	62895134	ppeak1037
chr6	83910870	83939254	ppeak1038
chr6	54622318	54645885	ppeak1039
chr12	52742142	52780842	ppeak104
chr14	40981541	41009309	ppeak1040
chr11	20837317	20868158	ppeak1041
chr12	13775100	13797085	ppeak1042
chr4	83766413	83776381	ppeak1043
chr1	64130196	64169048	ppeak1044
chr9	130827475	130856148	ppeak1045
chr16	46427460	46443225	ppeak1046
chr2	6677773	6685262	ppeak1048
chr1	265910601	265949064	ppeak1049
chr1	98418663	98462460	ppeak1050
chr8	11783804	11799977	ppeak1051
chr3	113729955	113764560	ppeak1052
chr3	73605821	73626439	ppeak1053
chr5	68676653	68679770	ppeak1055
chr7	76120079	76144953	ppeak1056
chr14	129394809	129424408	ppeak1057
chr11	9599181	9639479	ppeak1059
chr4	124229365	124246727	ppeak1060
chr3	92695836	92698392	ppeak1061
chr10	33001913	33015000	ppeak1062
chr7	96142575	96182543	ppeak1063
chr3	17540726	17561112	ppeak1064
chr3	25141195	25152240	ppeak1065
chr13	2574457	2592175	ppeak1066
chr9	134953988	134956052	ppeak1067
chr2	108255452	108279673	ppeak1068
chr1	253997769	254036660	ppeak1069
chr7	2034570	2090694	ppeak107
chr5	17239566	17284747	ppeak1070
chr4	2644182	2665206	ppeak1072
chr10	32133722	32161757	ppeak1074
chr1	127317110	127332804	ppeak1075
chr5	22020588	22022390	ppeak1076
chr14	29354689	29400918	ppeak1077
chr1	53865582	53876592	ppeak1078
chr9	3303350	3364903	ppeak108
chr1	158860152	158862326	ppeak1080
chr12	33375221	33419801	ppeak1081
chr11	39238831	39270537	ppeak1082
chr13	109028304	109030883	ppeak1083
chr1	32507271	32563657	ppeak1085
chr3	42962667	42989591	ppeak1086
chr2	13275189	13300145	ppeak1087
chr3	44147793	44162024	ppeak1088
chrX	124939832	124968957	ppeak1089
chr2	60484959	60567474	ppeak109
chr2	26873539	26882024	ppeak1090
chr9	66481841	66499838	ppeak1091
chr1	270178812	270191204	ppeak1092
chrUn_NW_018084979v1	692298	724405	ppeak1094
chr6	93540895	93563418	ppeak1095
chr7	92349168	92380932	ppeak1096
chr2	77453200	77473253	ppeak1097
chr1	254190519	254236877	ppeak1098
chr2	17762482	17790573	ppeak1099
chr2	75976165	76111595	ppeak11
chr3	10466528	10526043	ppeak110
chr2	75844228	75868539	ppeak1100
chr18	44755395	44807551	ppeak1101
chr13	23786472	23797519	ppeak1102
chr6	43925677	43947492	ppeak1103
chr13	50756353	50771408	ppeak1104
chr8	84389586	84392186	ppeak1105
chr5	8761223	8793184	ppeak1106
chr12	5119496	5157581	ppeak1107
chr6	69720267	69749862	ppeak1108
chr4	608102	630435	ppeak1109
chr3	39808854	39837415	ppeak1110
chr18	11532330	11549183	ppeak1111
chr3	53862225	53877745	ppeak1112
chr3	26179252	26201049	ppeak1113
chr12	26994909	27005997	ppeak1114
chr14	103711246	103742787	ppeak1115
chr7	121121262	121133820	ppeak1116
chr7	55563548	55595763	ppeak1117
chr9	19593763	19609665	ppeak1118
chr1	272169970	272218018	ppeak1119
chr2	59249808	59315180	ppeak112
chr7	1016577	1059725	ppeak1120
chrUn_NW_018084979v1	3271793	3307225	ppeak1122
chr8	133726601	133768530	ppeak1123
chr9	123564575	123611595	ppeak1124
chr13	77749400	77751760	ppeak1125
chr13	108425777	108436402	ppeak1126
chr5	84976171	85013261	ppeak1127
chr4	72518981	72547759	ppeak1128
chr12	43864713	43885973	ppeak1129
chr10	24283583	24324594	ppeak113
chr6	48688574	48706242	ppeak1130
chr13	185192704	185227449	ppeak1131
chr5	22376881	22400883	ppeak1132
chr17	43809409	43820031	ppeak1133
chrUn_NW_018084979v1	1888871	1901921	ppeak1134
chr5	1421679	1457759	ppeak1135
chrUn_NW_018084979v1	925010	950973	ppeak1137
chr2	69111040	69145440	ppeak1138
chr12	23308704	23329143	ppeak1139
chr3	1811002	1826110	ppeak1140
chr1	169914389	169916967	ppeak1141
chr13	77180069	77182507	ppeak1142
chr5	83395643	83411724	ppeak1143
chr13	23833341	23845574	ppeak1144
chr1	208220602	208257245	ppeak1145
chr2	76602949	76610913	ppeak1147
chr2	47281292	47311477	ppeak1148
chr6	4074901	4100501	ppeak1149
chr8	73303350	73305841	ppeak1150
chr6	89248262	89275551	ppeak1151
chr4	127016928	127037879	ppeak1152
chr15	47837708	47880829	ppeak1153
chr3	17380116	17407717	ppeak1154
chr1	213482694	213502461	ppeak1156
chr6	84643512	84661488	ppeak1157
chr9	12849893	12867394	ppeak1158
chr6	64900405	64954666	ppeak116
chr16	48463145	48479450	ppeak1160
chr6	119270373	119307252	ppeak1161
chr2	74744434	74761080	ppeak1162
chr8	88608231	88632311	ppeak1163
chr1	77399352	77401721	ppeak1164
chr4	180063	207031	ppeak1165
chr13	51260462	51302856	ppeak1166
chr14	129509969	129526858	ppeak1167
chr1	105075688	105078893	ppeak1168
chr7	98461540	98475660	ppeak1169
chr7	116708474	116788206	ppeak117
chr12	59520362	59616993	ppeak119
chr12	48141273	48193645	ppeak124
chr1	22239240	22261155	ppeak127
chr12	60723065	60760773	ppeak129
chr11	66482717	66526191	ppeak130
chr12	4258941	4320243	ppeak132
chrUn_NW_018084979v1	3499412	3525111	ppeak134
chr2	16544721	16584752	ppeak137
chr3	68563012	68622854	ppeak138
chr6	168520024	168546506	ppeak141
chr8	108263135	108315959	ppeak142
chr5	62998635	63068664	ppeak143
chr1	2602864	2643981	ppeak146
chr13	109784892	109863372	ppeak149
chr12	18217429	18317496	ppeak15
chr6	64175547	64215210	ppeak150
chr5	21146668	21187204	ppeak151
chr5	65467345	65525659	ppeak153
chr5	663916	702366	ppeak155
chr4	93879772	93919775	ppeak156
chr1	9130772	9193545	ppeak157
chr12	54833882	54895414	ppeak158
chr3	669640	776293	ppeak16
chr9	17151229	17236853	ppeak160
chr2	7277492	7328461	ppeak161
chr1	9505115	9577140	ppeak163
chr11	6700649	6772875	ppeak165
chr12	60474637	60531233	ppeak169
chr12	20715666	20765970	ppeak170
chr12	43536562	43592413	ppeak174
chr7	53459205	53505311	ppeak176
chr6	59631347	59685482	ppeak178
chr13	141164707	141226536	ppeak180
chr6	108994757	109071884	ppeak182
chr6	51807877	51856519	ppeak183
chr5	60531588	60624876	ppeak184
chr1	130974240	131006602	ppeak185
chr6	63528418	63593815	ppeak186
chr3	17742055	17778989	ppeak187
chr4	108838802	108873146	ppeak188
chr12	26297000	26376703	ppeak189
chr14	72513942	72555554	ppeak190
chr2	135068356	135105141	ppeak191
chr12	45388893	45430489	ppeak192
chr15	63496054	63506021	ppeak193
chrUn_NW_018084979v1	3368972	3414013	ppeak194
chr11	20965949	21022903	ppeak195
chr14	47265108	47335858	ppeak196
chr7	29044436	29118835	ppeak197
chr1	98515655	98544884	ppeak198
chr14	74124331	74187955	ppeak199
chr7	35122386	35231715	ppeak20
chr6	6822563	6889486	ppeak200
chr2	7443437	7490353	ppeak201
chr12	7626977	7697385	ppeak202
chrUn_NW_018084833v1	1525193	1592010	ppeak203
chr7	98574891	98614172	ppeak204
chr12	24223639	24279903	ppeak205
chr11	67918036	67974799	ppeak209
chr4	275560	335900	ppeak210
chr15	45591023	45644338	ppeak212
chr12	60842715	60881297	ppeak213
chr7	93253723	93295953	ppeak214
chr1	239820285	239851164	ppeak215
chr6	15932416	15964862	ppeak216
chr13	70829881	70890989	ppeak218
chr12	24153313	24209822	ppeak221
chr1	34692893	34743431	ppeak223
chr5	78167305	78204765	ppeak224
chr3	8695374	8739518	ppeak225
chrUn_NW_018085108v1	15021	51879	ppeak226
chr12	5614325	5642747	ppeak227
chr3	38006450	38049606	ppeak228
chr6	69357024	69415093	ppeak229
chr6	33728916	33750292	ppeak231
chr1	225712494	225722658	ppeak232
chr4	126777211	126875656	ppeak233
chr7	29788119	29862316	ppeak235
chr9	53429159	53464999	ppeak236
chr6	84035352	84051562	ppeak237
chr17	28029623	28059800	ppeak238
chr10	19807299	19838386	ppeak239
chrUn_NW_018084979v1	1685687	1779387	ppeak240
chr1	268558390	268600488	ppeak242
chr14	29510813	29544198	ppeak245
chr17	30982108	31011381	ppeak246
chr9	6064397	6135894	ppeak247
chr6	64239677	64273813	ppeak252
chr4	89277916	89312156	ppeak254
chr13	32814787	32843279	ppeak256
chr12	40123660	40175038	ppeak259
chr4	16492944	16561867	ppeak26
chr6	53977960	53993752	ppeak260
chr1	107179236	107218640	ppeak261
chr6	59705047	59726641	ppeak263
chr1	10225197	10233496	ppeak265
chr7	57978913	58016091	ppeak266
chr6	40565182	40666321	ppeak267
chr2	8017426	8066604	ppeak268
chr1	267771914	267818811	ppeak269
chr6	53040627	53081019	ppeak270
chr3	68958914	69041053	ppeak272
chr2	141878206	141922594	ppeak274
chr16	51300914	51378647	ppeak278
chr7	97078316	97107221	ppeak281
chr3	31064313	31154288	ppeak283
chr2	61288479	61346271	ppeak284
chr7	40980499	41062760	ppeak285
chr17	62708131	62734205	ppeak286
chr6	69801369	69865373	ppeak287
chr16	71347194	71372158	ppeak288
chr2	76631107	76672091	ppeak289
chr4	90374869	90447808	ppeak29
chr16	38128429	38192855	ppeak290
chr4	123514618	123591834	ppeak291
chr2	151747283	151768215	ppeak292
chr12	1054733	1099990	ppeak293
chr3	11622865	11685516	ppeak296
chr3	9961956	9995890	ppeak297
chr14	61653770	61668510	ppeak300
chr3	37735831	37765731	ppeak303
chr6	32036376	32095669	ppeak304
chr10	27145256	27173108	ppeak305
chr1	268010898	268066547	ppeak306
chr14	76390556	76440030	ppeak308
chr2	11875273	11931359	ppeak310
chr18	46203685	46206664	ppeak311
chr3	6049726	6141286	ppeak312
chr3	41189434	41219517	ppeak314
chr1	143108702	143145420	ppeak315
chr15	133119913	133150326	ppeak317
chr12	52658621	52681836	ppeak319
chr1	235877351	235927585	ppeak322
chr12	43445782	43481911	ppeak324
chr6	52598003	52632684	ppeak325
chrUn_NW_018085316v1	44487	51064	ppeak326
chr14	115240754	115278222	ppeak328
chr6	63634560	63706702	ppeak33
chr2	144183334	144253492	ppeak330
chr14	28484004	28558151	ppeak331
chrUn_NW_018084979v1	3014148	3061587	ppeak333
chr12	47908832	47940873	ppeak335
chr13	72487275	72552060	ppeak336
chr3	4079076	4128353	ppeak34
chr13	34075726	34100758	ppeak341
chr3	44405487	44484110	ppeak343
chr7	694925	720521	ppeak344
chr8	20062161	20097470	ppeak348
chr8	45754576	45809458	ppeak349
chr5	10374708	10433130	ppeak35
chr9	46284699	46337025	ppeak350
chr6	40401611	40449006	ppeak351
chr14	47977200	48031801	ppeak352
chr1	271336391	271358933	ppeak354
chr4	65122529	65209402	ppeak355
chr13	32312225	32342048	ppeak356
chr2	89016340	89058107	ppeak358
chr1	162464205	162521891	ppeak360
chr18	38222036	38259288	ppeak361
chr8	4206899	4239134	ppeak362
chr4	98250563	98260034	ppeak363
chr9	41638792	41678657	ppeak365
chr18	50449293	50511062	ppeak366
chr6	52519639	52562877	ppeak367
chr16	51209219	51248849	ppeak368
chr10	53602090	53650627	ppeak369
chr3	97235400	97327042	ppeak37
chr3	112021845	112081035	ppeak370
chr3	39934772	39948006	ppeak372
chr1	262180335	262212545	ppeak374
chr2	69474039	69517539	ppeak376
chr2	72582134	72611153	ppeak377
chr2	60396378	60471544	ppeak378
chr3	113469407	113563458	ppeak38
chr2	140494054	140532875	ppeak380
chr7	2104866	2167940	ppeak381
chr14	51403167	51445817	ppeak382
chr12	5176654	5226935	ppeak383
chr5	3190941	3209398	ppeak384
chr6	13623853	13663557	ppeak385
chr6	147051997	147098553	ppeak386
chr5	64295593	64336975	ppeak387
chr3	39962899	40005652	ppeak389
chr4	127051719	127075512	ppeak390
chr2	7813281	7844005	ppeak393
chr7	28995853	29027588	ppeak394
chr15	120051201	120086864	ppeak395
chr1	236809614	236854769	ppeak396
chr3	124175371	124196875	ppeak399
chrM	531	16447	ppeak4
chr1	12324237	12376413	ppeak401
chr11	17687783	17691921	ppeak402
chr2	77263567	77301125	ppeak403
chr14	50739961	50759666	ppeak404
chr2	1194544	1213167	ppeak405
chr6	55315714	55332720	ppeak406
chr11	76996620	77029726	ppeak407
chr3	127033922	127106082	ppeak408
chr2	151584152	151632528	ppeak409
chr2	77766985	77813165	ppeak410
chr10	39875132	39879251	ppeak411
chr14	140888968	140901796	ppeak412
chr2	60340291	60381338	ppeak415
chr18	553510	586926	ppeak417
chr10	24154594	24201058	ppeak418
chr6	93820708	93878613	ppeak419
chr2	59764854	59778397	ppeak420
chr12	40075281	40105707	ppeak421
chr1	270839756	270885916	ppeak422
chr11	9668940	9691140	ppeak423
chr13	201008475	201011207	ppeak424
chr12	6281820	6299937	ppeak425
chr6	92473408	92506244	ppeak426
chr2	71307370	71348284	ppeak427
chr5	9955877	9967822	ppeak428
chr2	282130	304200	ppeak429
chr13	196066316	196092506	ppeak430
chr6	54879930	54891624	ppeak432
chr11	16374357	16377179	ppeak433
chr3	97199056	97202816	ppeak434
chr14	134368437	134423597	ppeak436
chrUn_NW_018084979v1	807683	829414	ppeak437
chr13	47881742	47934385	ppeak438
chr17	10623726	10657348	ppeak439
chr3	11383971	11420360	ppeak440
chr18	17998946	18028646	ppeak442
chr5	9470449	9486569	ppeak443
chr12	718150	780865	ppeak444
chr6	63951294	63974323	ppeak445
chr2	9119160	9139081	ppeak446
chr12	3211575	3249141	ppeak448
chr1	251815182	251971436	ppeak45
chr15	17712397	17765330	ppeak451
chr2	87755386	87779086	ppeak453
chr6	18871255	18914009	ppeak455
chr2	8897783	8928982	ppeak456
chrUn_NW_018084833v1	1112695	1151494	ppeak457
chr2	150290458	150319888	ppeak458
chr14	7344220	7371746	ppeak459
chr8	38563281	38610960	ppeak460
chr13	117996116	118068265	ppeak461
chr8	1576444	1602100	ppeak463
chr17	62626126	62691224	ppeak464
chr13	134076910	134115040	ppeak465
chr15	109353857	109376905	ppeak466
chr12	1189800	1233633	ppeak467
chr17	47713095	47739632	ppeak469
chr14	49332960	49387863	ppeak473
chr2	24811292	24860172	ppeak474
chr15	132091313	132136690	ppeak475
chr9	9553837	9572217	ppeak476
chr12	18003495	18038253	ppeak477
chr17	61737660	61759658	ppeak479
chr9	47334658	47363600	ppeak480
chr6	78034690	78084912	ppeak481
chr5	7134044	7161671	ppeak484
chr2	51661897	51703132	ppeak485
chr6	83644987	83695865	ppeak488
chr1	166110	209024	ppeak489
chr13	99501874	99588729	ppeak49
chr9	131486530	131519758	ppeak491
chr5	65650737	65689263	ppeak492
chr9	248254	288629	ppeak493
chr2	4681496	4695468	ppeak494
chr6	47644234	47663900	ppeak495
chr1	147760088	147782802	ppeak496
chr14	134480889	134489534	ppeak497
chr2	59675775	59706282	ppeak498
chr13	2514707	2560988	ppeak499
chr13	87726761	87760016	ppeak50
chr3	71361722	71424738	ppeak501
chr13	31136342	31160382	ppeak502
chr1	261797431	261837701	ppeak503
chr10	57928620	57966821	ppeak504
chr6	49542692	49580013	ppeak505
chr13	97001395	97021142	ppeak507
chr6	53215617	53272042	ppeak508
chr14	6410638	6444552	ppeak509
chr9	6282733	6320265	ppeak51
chr12	35560906	35585872	ppeak510
chr2	78754591	78770438	ppeak512
chr6	59544317	59579074	ppeak513
chr4	2802497	2858149	ppeak514
chr6	71961622	71989111	ppeak515
chr9	64910	105993	ppeak516
chr11	16180501	16292199	ppeak517
chr5	18580595	18603126	ppeak518
chr1	158805687	158838106	ppeak519
chr4	125109558	125200595	ppeak52
chr11	19374148	19416844	ppeak520
chr6	52098710	52124435	ppeak521
chr2	16331757	16365791	ppeak522
chr1	267688291	267746060	ppeak524
chr12	59121754	59165425	ppeak525
chr2	5480229	5538353	ppeak526
chr6	44746542	44775384	ppeak527
chr6	51510532	51538805	ppeak528
chr16	33776989	33798904	ppeak529
chr13	185244555	185311762	ppeak532
chr1	6951297	7004900	ppeak533
chr12	5854458	5869794	ppeak534
chr3	31331661	31355660	ppeak535
chr6	166891262	166910598	ppeak540
chr12	4971415	5024988	ppeak541
chr9	102650191	102695707	ppeak542
chr7	38190303	38224863	ppeak543
chr11	52156720	52174774	ppeak544
chr7	20988667	21025172	ppeak545
chr1	57127838	57130255	ppeak546
chr2	135282397	135306757	ppeak548
chrX	5995064	6032556	ppeak549
chr5	59709109	59759678	ppeak55
chrUn_NW_018084833v1	1343327	1383903	ppeak551
chr2	1260859	1280432	ppeak552
chr12	1442937	1456263	ppeak553
chr1	112742760	112777657	ppeak554
chr5	21976120	21992860	ppeak555
chr10	50469673	50504521	ppeak556
chr5	7393040	7433025	ppeak557
chr6	50459296	50478338	ppeak558
chr14	113410640	113464704	ppeak559
chr3	128836274	128873871	ppeak560
chr6	1080785	1130591	ppeak561
chr2	7119485	7198150	ppeak562
chr6	84129350	84155000	ppeak565
chr13	202463763	202483028	ppeak566
chr12	59418003	59468123	ppeak567
chr6	79451210	79469501	ppeak568
chr13	71299411	71339070	ppeak569
chr14	133534275	133561416	ppeak571
chr12	51923468	51943698	ppeak572
chr3	18042769	18061683	ppeak573
chr4	108650756	108674610	ppeak575
chr9	133179294	133227508	ppeak576
chrX	88173599	88196688	ppeak578
chr14	81463852	81486281	ppeak579
chr6	1179860	1218412	ppeak580
chr2	69716279	69741417	ppeak581
chr1	129793681	129844573	ppeak582
chr17	31558874	31600255	ppeak583
chr2	148986456	149045924	ppeak584
chr14	131946675	131967116	ppeak586
chr1	260953676	260994718	ppeak587
chr12	4346292	4380740	ppeak588
chr14	19824637	19852422	ppeak589
chr18	14128361	14148916	ppeak591
chr5	6688422	6721239	ppeak592
chr6	78728523	78743778	ppeak594
chr12	47784355	47806220	ppeak595
chr13	160181963	160224905	ppeak596
chr6	28155663	28182084	ppeak597
chr4	14295875	14310699	ppeak598
chr3	17093180	17113911	ppeak599
chr3	39505008	39585187	ppeak60
chr6	165995963	166042285	ppeak600
chr6	67426492	67456175	ppeak601
chr16	44402818	44438910	ppeak603
chr7	111252574	111291325	ppeak608
chr2	150660279	150662957	ppeak610
chr3	111481552	111500555	ppeak611
chr2	15184894	15215958	ppeak612
chr9	47444702	47476872	ppeak614
chr5	60739164	60778032	ppeak615
chr6	92398694	92451120	ppeak616
chr14	81505747	81540850	ppeak617
chr18	6327990	6459980	ppeak62
chr5	6071510	6128553	ppeak620
chr6	438746	466200	ppeak621
chr13	68981667	68997239	ppeak622
chr13	31177926	31184452	ppeak623
chr6	27366147	27407126	ppeak624
chr3	52527296	52573503	ppeak625
chr4	98897040	98934845	ppeak626
chr6	49598217	49636639	ppeak627
chr6	69246968	69309040	ppeak628
chr6	27794511	27835483	ppeak629
chr1	270040890	270121549	ppeak63
chr11	20881781	20907628	ppeak631
chr13	145549157	145581700	ppeak632
chr2	130226254	130260850	ppeak634
chr13	109928977	109981366	ppeak636
chr16	21680171	21745554	ppeak637
chr9	488603	537729	ppeak638
chr6	36359904	36413972	ppeak640
chr5	7186214	7211797	ppeak641
chr7	116504655	116538044	ppeak642
chr14	60065340	60108204	ppeak643
chr15	67007922	67021684	ppeak644
chr6	129743478	129783982	ppeak645
chr12	44948526	44977512	ppeak646
chr10	23805368	23833445	ppeak647
chr8	87457493	87480310	ppeak648
chr15	79983907	79986620	ppeak649
chr15	48121248	48137969	ppeak650
chr7	28912306	28931417	ppeak651
chr4	34265181	34283072	ppeak652
chr7	9807625	9860471	ppeak653
chr1	137525040	137593500	ppeak655
chr17	12935545	12967808	ppeak657
chr18	6859720	6878265	ppeak658
chr17	29264063	29287602	ppeak659
chr6	68455558	68488163	ppeak660
chr12	52033611	52067190	ppeak661
chr7	120754219	120782312	ppeak664
chr6	167936600	167960658	ppeak665
chr1	126541329	126571965	ppeak666
chr5	101489433	101501872	ppeak667
chrUn_NW_018084804v1	107599	140496	ppeak668
chr18	38181977	38194208	ppeak669
chr2	88919733	88961639	ppeak671
chr3	111770922	111794877	ppeak672
chr10	47999273	48026199	ppeak673
chr6	146346320	146383861	ppeak674
chr3	1996057	2027921	ppeak675
chr9	52423229	52470044	ppeak676
chr3	39771390	39794999	ppeak677
chr14	73400417	73434985	ppeak678
chr9	6148542	6193198	ppeak679
chr1	268356181	268391539	ppeak680
chr14	29423449	29477581	ppeak681
chr3	47634512	47668545	ppeak683
chr2	81371562	81380599	ppeak684
chr18	37692037	37725230	ppeak685
chr5	389989	403356	ppeak689
chr17	34818985	34906295	ppeak69
chrUn_NW_018084833v1	598642	620186	ppeak690
chr3	77607334	77666362	ppeak691
chr7	32275823	32290995	ppeak693
chr15	139663376	139705171	ppeak695
chr6	54053236	54076454	ppeak697
chr18	43878372	43912149	ppeak698
chr12	18142093	18170006	ppeak699
chr1	266932740	267087428	ppeak7
chr1	107886202	107956204	ppeak70
chr6	19676455	19698051	ppeak701
chr3	17791976	17812220	ppeak702
chr6	2542591	2561877	ppeak703
chr14	73154100	73201600	ppeak704
chr6	40291754	40329562	ppeak705
chr14	49905282	49931712	ppeak706
chr14	77921970	77934199	ppeak707
chr1	148968765	148992468	ppeak710
chr17	48107940	48134235	ppeak711
chr13	136961994	136981246	ppeak712
chr1	22300362	22342052	ppeak713
chr5	18435724	18460785	ppeak714
chr13	96642883	96659798	ppeak716
chr2	77657797	77694887	ppeak717
chr6	36329646	36344336	ppeak718
chr14	41442039	41456487	ppeak719
chr6	19045953	19096724	ppeak72
chr14	99444571	99456740	ppeak720
chr6	88786756	88800913	ppeak721
chr7	59441769	59481381	ppeak722
chr8	31941989	31976406	ppeak724
chr14	48543389	48552423	ppeak725
chr6	60436803	60468469	ppeak727
chr15	133520553	133550198	ppeak728
chr10	33304094	33346093	ppeak729
chr15	45542123	45568825	ppeak730
chr6	47290105	47333632	ppeak731
chr12	23239071	23268505	ppeak733
chr11	76634796	76656241	ppeak734
chr11	7142662	7169013	ppeak735
chr18	50779850	50806041	ppeak736
chr8	29511215	29552790	ppeak737
chr4	117026905	117069657	ppeak738
chr15	135002642	135089651	ppeak74
chr2	62329957	62369265	ppeak740
chr6	69081218	69118023	ppeak741
chr6	28272813	28312254	ppeak742
chr5	65595314	65636865	ppeak743
chr5	9569668	9604304	ppeak744
chr6	167855223	167882021	ppeak746
chr10	23274428	23315915	ppeak748
chr2	9055512	9096145	ppeak749
chr6	45171789	45200168	ppeak750
chr6	109089214	109120575	ppeak751
chr9	46511173	46526577	ppeak752
chr7	66786606	66802686	ppeak753
chr17	5347290	5386955	ppeak754
chr1	158700015	158726402	ppeak755
chr2	76687369	76722702	ppeak756
chr18	6164054	6210384	ppeak757
chr11	67864759	67902819	ppeak758
chr18	51332783	51384598	ppeak759
chr9	6678906	6704337	ppeak760
chr11	77046373	77086153	ppeak761
chr8	138768387	138791272	ppeak762
chrUn_NW_018084979v1	1263373	1310062	ppeak763
chr14	60309215	60353984	ppeak764
chr7	7328174	7360675	ppeak766
chr6	63344862	63378902	ppeak767
chr6	147142732	147161533	ppeak768
chr4	13422036	13447938	ppeak769
chr9	55596033	55669137	ppeak77
chr10	13704512	13753785	ppeak770
chr3	109061392	109118629	ppeak772
chr9	73067253	73090950	ppeak773
chr13	66350615	66377527	ppeak774
chr14	82344091	82364430	ppeak775
chr1	253427825	253460560	ppeak776
chr6	70597491	70634119	ppeak777
chr7	55723645	55767472	ppeak778
chr1	269451456	269476465	ppeak779
chr8	118202191	118204849	ppeak780
chr8	10400464	10402727	ppeak781
chr2	7977480	8001754	ppeak782
chr14	107114433	107137268	ppeak783
chr14	28777224	28787243	ppeak784
chr13	92613171	92675677	ppeak786
chr1	271251404	271270309	ppeak787
chr2	4207574	4237859	ppeak788
chr3	18245690	18263515	ppeak789
chr12	20278852	20292105	ppeak792
chr6	53423476	53467226	ppeak793
chr14	105810753	105841749	ppeak795
chr13	196598951	196646142	ppeak796
chr15	87371349	87391891	ppeak797
chr6	98805459	98815575	ppeak798
chr6	85642162	85658707	ppeak799
chr5	6747278	6800308	ppeak80
chr17	31928925	31954863	ppeak800
chr15	95603125	95649633	ppeak802
chr1	162335708	162386264	ppeak804
chr2	75908461	75950333	ppeak805
chr9	9585894	9597686	ppeak806
chr12	3976903	4009153	ppeak807
chr6	75445263	75460472	ppeak809
chr2	65868557	65914576	ppeak81
chr10	64789315	64819631	ppeak810
chr10	69293626	69305527	ppeak811
chr7	120467143	120487701	ppeak812
chr9	134968826	134980981	ppeak813
chr14	109049275	109075249	ppeak814
chr17	33398842	33418293	ppeak815
chr15	47683997	47697669	ppeak817
chr2	96187166	96231189	ppeak819
chr6	68986618	69040347	ppeak82
chr15	120386772	120411377	ppeak820
chr1	241555212	241577304	ppeak823
chr8	824162	839763	ppeak824
chrUn_NW_018084833v1	935735	962360	ppeak825
chr6	161156171	161174668	ppeak826
chr7	340531	363474	ppeak827
chr2	7075333	7103877	ppeak828
chr14	41219341	41240332	ppeak829
chr6	63080765	63133565	ppeak83
chr2	66260535	66272939	ppeak830
chr12	45574001	45607476	ppeak831
chr6	48304311	48327096	ppeak832
chr5	9318555	9323041	ppeak833
chr7	93515842	93558350	ppeak834
chr5	59869200	59871445	ppeak836
chr17	44038005	44071239	ppeak837
chr6	82354510	82383655	ppeak839
chr6	51479617	51487073	ppeak840
chr18	5567318	5607108	ppeak842
chr7	2368946	2383283	ppeak843
chr2	135339449	135346731	ppeak845
chr7	2237876	2272968	ppeak846
chr7	75769937	75789977	ppeak847
chr9	7596446	7614513	ppeak848
chr14	41963889	41979249	ppeak849
chr4	19119313	19146651	ppeak850
chr8	75917819	75962575	ppeak851
chr13	39789718	39826799	ppeak852
chr2	25074172	25095338	ppeak853
chr3	41317671	41357295	ppeak854
chr3	1004897	1030129	ppeak855
chr6	77865224	77892351	ppeak856
chr12	20507842	20540295	ppeak857
chr5	21317547	21337321	ppeak858
chr2	5048006	5061718	ppeak860
chr7	74929914	74969578	ppeak861
chr7	20905920	20923255	ppeak862
chr2	140410996	140442185	ppeak863
chr10	57860952	57897680	ppeak864
chr14	125068767	125109170	ppeak865
chr9	46062078	46064232	ppeak866
chr6	95059231	95081475	ppeak867
chr6	70378296	70425958	ppeak868
chr6	151244158	151257527	ppeak869
chr12	6878528	6889911	ppeak870
chr10	10857188	10888526	ppeak871
chr2	143207494	143220246	ppeak872
chr13	90640508	90643024	ppeak873
chr7	46193895	46226300	ppeak874
chr14	47519364	47525795	ppeak875
chr14	42207532	42224529	ppeak876
chr10	23477306	23492211	ppeak878
chr13	207059440	207076165	ppeak879
chr10	66490945	66520350	ppeak880
chr8	29448175	29464331	ppeak882
chr6	56233005	56261516	ppeak883
chr12	44012449	44060961	ppeak884
chr6	118930050	118977504	ppeak887
chr18	36873633	36911306	ppeak888
chr3	469691	510266	ppeak889
chr2	120649172	120668372	ppeak890
chr2	9176816	9194270	ppeak891
chr6	54711076	54734112	ppeak892
chr3	31539180	31549393	ppeak893
chr1	108468207	108530186	ppeak895
chr8	104550734	104575476	ppeak896
chr10	17558449	17560598	ppeak897
chr7	88574850	88577165	ppeak898
chr1	43334197	43393724	ppeak899
chr3	8356063	8416401	ppeak9
chr14	6359765	6382591	ppeak900
chr15	83001499	83009871	ppeak901
chr3	39056463	39100267	ppeak902
chr14	51602089	51642761	ppeak903
chr10	17495242	17497532	ppeak906
chr2	7924022	7926038	ppeak907
chr4	76827943	76860846	ppeak908
chr7	93308509	93341690	ppeak909
chr6	167268964	167287048	ppeak91
chr1	37193183	37203653	ppeak912
chr10	42914768	42915969	ppeak913
chr2	6089374	6108404	ppeak914
chr15	139527864	139543264	ppeak915
chr12	3778114	3800148	ppeak916
chr4	122503938	122517847	ppeak917
chr6	63862544	63899065	ppeak919
chr4	95729015	95768048	ppeak92
chr7	112336568	112390387	ppeak920
chr3	8012010	8032778	ppeak921
chr2	16607225	16620333	ppeak922
chr10	52094192	52123113	ppeak924
chr2	81442375	81466061	ppeak925
chr2	7869862	7884706	ppeak926
chr17	40367431	40389739	ppeak929
chr15	80533962	80572911	ppeak930
chr12	33812329	33872076	ppeak932
chr6	44792896	44815974	ppeak934
chr2	65095564	65109279	ppeak935
chr8	93023552	93049556	ppeak937
chr1	12297638	12309074	ppeak938
chr6	52056012	52069715	ppeak939
chr2	88869416	88903643	ppeak940
chr13	135541635	135583468	ppeak941
chr2	25115809	25139218	ppeak942
chr15	95247750	95281682	ppeak943
chr13	31552735	31582133	ppeak945
chr1	271074948	271088727	ppeak947
chr14	76498635	76511990	ppeak948
chr4	939972	970198	ppeak949
chr15	63592497	63615383	ppeak950
chr2	895873	913014	ppeak951
chr3	46966025	46993778	ppeak952
chr5	87179671	87192901	ppeak953
chr5	27352511	27396435	ppeak954
chrUn_NW_018084979v1	2135946	2164762	ppeak956
chr5	3382918	3405340	ppeak957
chr12	34616873	34651391	ppeak958
chr1	144071475	144119753	ppeak959
chr12	945147	1038715	ppeak96
chr3	17487309	17503830	ppeak961
chr2	13192463	13218371	ppeak962
chr7	92325747	92336578	ppeak963
chrUn_NW_018084979v1	1098338	1119316	ppeak965
chr2	105201496	105214329	ppeak966
chr18	54428480	54431420	ppeak967
chr3	75596051	75634180	ppeak968
chr8	3907693	3940598	ppeak969
chr12	51157729	51197166	ppeak97
chr7	1177182	1183454	ppeak970
chr6	75270069	75304162	ppeak971
chr9	17001407	17041914	ppeak972
chr5	21495036	21519381	ppeak973
chr1	163090931	163120023	ppeak974
chr8	86689684	86738216	ppeak975
chr12	4048090	4102121	ppeak977
chr16	46457408	46495431	ppeak978
chr12	5935395	5964857	ppeak979
chr12	11933955	12022350	ppeak98
chr2	71871267	71905534	ppeak980
chr5	3492841	3505395	ppeak981
chr2	65172478	65193362	ppeak982
chr9	102753772	102782981	ppeak983
chr7	29953909	29997721	ppeak984
chr16	40103846	40107331	ppeak985
chr13	115481510	115488952	ppeak986
chr6	79585499	79622896	ppeak987
chr4	99189957	99226117	ppeak988
chr17	62512784	62549567	ppeak989
chr7	98321485	98376331	ppeak99
chr9	65891017	65912841	ppeak990
chr15	113282248	113342936	ppeak991
chr10	19869158	19889979	ppeak992
chr17	14474753	14513986	ppeak993
chr15	101031969	101076726	ppeak994
chr17	14590718	14637095	ppeak995
chr13	32077876	32128695	ppeak996
chr15	139257831	139284769	ppeak997
chr4	19319499	19335536	ppeak998
chr17	41252800	41285850	ppeak999

[truncated: 16 more sheets: pig_liver_SE_s, pig_liver_SE_u, pig_liver_BD_u, pig_liver_BD_s, pig_muscle_SE_s, pig_muscle_SE_u, pig_muscle_BD_s, pig_muscle_BD_u, pig_lung_SE_u, pig_lung_SE_s, pig_lung_BD_u, pig_lung_BD_s, pig_spleen_SE_u, pig_spleen_SE_s, pig_spleen_BD_u, pig_]
